1 **TITLE**

2 **Epithelial-to-mesenchymal transition lowers the cholesterol pathway, wich**  
3 **influences colon tumors differentiation.**

4

5 **RUNNING TITLE**

6 **Epithelial-to-mesenchymal transition regulates the cholesterol pathway and colon**  
7 **cancer differentiation**

8

9

10 **AUTHORS' LIST**

11 Anaïs Aulas<sup>1\*</sup>, Maria Lucia Liberatoscioli<sup>1\*</sup>, Pascal Finetti<sup>1</sup>, Olivier Cabaud<sup>1</sup>, David J.  
12 Birnbaum<sup>1,2</sup>, Daniel Birnbaum<sup>1#</sup>, François Bertucci<sup>1,3#</sup> & Emilie Mamessier<sup>1#</sup>

13

14 **AUTHORS' CONTRIBUTION and notes**

15 AA, FB, DB and EM designed the study. AA, MLL, and OC performed experiments. PF,  
16 MLL and FB did the biocomputational analyses. DJB provided samples and clinical  
17 rationale. FB, DJB, DB proofread the manuscript. AA, MLL and EM designed the figures  
18 and wrote the manuscript. co-authorship: \* AA and ML are co-first authors. # DB, FB  
19 and EM are co-last authors.

20

21 **AFFILIATION**

22 <sup>1</sup> Predictive Oncology Laboratory, Cancer Research Center of Marseille (CRCM),  
23 Inserm U1068, CNRS UMR7258, Institut Paoli-Calmettes, Aix Marseille Université,  
24 Marseille, France.

25 <sup>2</sup> Department of Digestive Surgery, Hospital Nord, Aix-Marseille University, Chemin des  
NOTE: This preprint reports new research that has not been certified by peer review and should not be used to guide clinical practice.  
26 Bourrely, 13015, Marseille, France.

27 <sup>3</sup> Oncology Medical unit, Institut Paoli-Calmettes, Aix-Marseille University, Marseille,  
28 France.

29

30 **CORRESPONDING AUTHOR**

31 [emilie.mamessier@inserm.fr](mailto:emilie.mamessier@inserm.fr)

32

33 **KEY WORDS**

34 Epithelial to mesenchymal transition, EMT, mesenchymal to epithelial transition, MET,  
35 colorectal cancer, metastasis, prognosis, cholesterol, survival

36

37

38 **TRANSLATIONAL RELEVANCE (120-150 WORD)**

39 Metastases are the main cause of death of colorectal cancer (CRC) and the  
40 major issue in CRC management. Understanding the chain of events that lead to  
41 metastasis occurrence is urgent to identify new biomarkers of progression and/or new  
42 potential targets. Epithelial to mesenchymal transition (EMT) is a major player in cancer  
43 dissemination that remains non-targetable due to its broad involvement in tissue  
44 homeostasis. Here, we used a relevant *in vitro* dynamic model to identify the pathways  
45 triggered during EMT in CRC and how this might improve tumors classification,  
46 prognosis and open therapeutic avenue for this deadly disease. The cholesterol  
47 pathway surprisingly popped-out from this model and turned out to be a good prognosis  
48 factor of disease-free survival for CRC. Altogether, our results showed that an active  
49 EMT program lowers the cholesterol pathway, which further influence the differentiation  
50 of colon tumor toward the most aggressive subtypes.

51

52

53 **ABSTRACT 250 words**

54 Colorectal cancer (CRC) is the second cause of death worldwide. Up to 70% of  
55 CRC patients will metastasize at one point. Understanding the chain of events that lead  
56 to metastasis occurrence is urgent to identify new biomarkers of progression or new  
57 targets to prevent and delay disease evolution. Epithelial to mesenchymal transition  
58 (EMT) is a major program engaged during metastasis. EMT is extremely complex to  
59 analyze *in situ* due to the broad involvement of its transcription factors. We  
60 hypothesized that a relevant and dynamic *in vitro* model of pure cancer cells will reveal  
61 a combination of new genes that might further identify signs of EMT in cancer tissues.

62 We treated HT-29 cells grown in 3D with an EMT-inducing factor, but also looked  
63 at reverse changes after EMT-inducing factor removal. For each condition, pan-  
64 transcriptomic analyses were done. Genes that were both induced upon EMT induction  
65 and inhibited upon EMT release (mesenchymal to epithelial transition or MET) were  
66 selected. Consistent with our hypothesis, we identified new genes for the EMT-MET  
67 programs. These genes were used to build a metagene that, when applied to a large  
68 database of transcriptomic data from primary colorectal tumors (n= 2,239), had an  
69 independent prognosis value. Finally, we submitted this metagene to CMap and  
70 identified drugs that might affect EMT-MET programs. Statins, well-known inhibitors of  
71 cholesterol synthesis, were among them and effectively delayed MET *in vitro*. These  
72 data show that cholesterol and EMT pathways are opposite regulators and impact  
73 differently tumors' differentiation and outcome.

## 74 **INTRODUCTION**

75           Colorectal cancer (CRC) is the third most common cancer and the second cause  
76 of death worldwide (International Agency for Research on Cancer, WHO;  
77 <http://gco.iarc.fr/today/fact-sheets-cancers>). However, the actual therapeutic  
78 management proposed to CRC patients is not sufficient. For now, it consists in the  
79 surgical removal of the primary tumor, followed by adjuvant chemotherapy in high-risk  
80 cases. Metastases are the main cause of death of CRC patients, and thus the major  
81 issue in CRC management. Up to 70% of CRC patients will relapse or metastasize  
82 within 5 years following surgery of the primary tumor. The 5-year overall survival for  
83 metastatic patients is 14% against 90% for non-metastatic patients [1].

84           Cells prone to metastasis undergo an epithelial-to-mesenchymal transition  
85 (EMT), a biological process by which cells are re-programmed, lose their cell-to-cell  
86 contacts, polarity and ultimately reshape their cytoskeleton to escape from the initial  
87 tumor site [2]. Many works have searched for the initial events that trigger EMT in  
88 cancer cells, based on the assumption that targeting EMT inducers might limit  
89 metastasis [3, 4]. TGF $\beta$ , which is a prominent growth factor at primary tumor sites [5, 6],  
90 turned up to be a key inducer of the EMT program [7]. However, TGF $\beta$  inhibition was  
91 not successful because of the major involvement of this growth factor in many other  
92 physiological functions [5, 6]. Moreover, EMT can be triggered in many ways that go  
93 beyond the TGF $\beta$  pathway alone [8, 9]. We choose to use a combination of different  
94 factors known to be involved in the EMT process such as recombinant WNT5A [10, 11],  
95 TGF $\beta$  [12] and neutralizing antibodies against known inhibitors of EMT, such as SFRP1  
96 [13, 14], DKK1 [15] and CDH1 [16, 17]. The combination of these factors reproducibly  
97 induces an EMT phenotype in epithelial cancer cells cultivated *in vitro* within one week:  
98 cells detach from their neighbors, adopt spindle shapes and a migratory potential.  
99 Characteristic features of treated cells are a decreased expression of adhesion proteins

100 E-Cadherin and Occludin, whereas Fibronectin and Vimentin expression are enhanced  
101 [18-20].

102 The identification of genes specifically activated during the EMT program has  
103 been another goal, however difficult to achieve in complex samples such as human  
104 tumors. *In vitro* approaches have thus often been privileged. A major common caveat  
105 from these approaches was that the cells exposed to the different EMT inducing  
106 factors were usually grown flat [6, 15, 21-23]. We know now that signaling pathways of  
107 cells grown in 2D are different from those of tissues and that 3D cultures are more  
108 relevant [24, 25]. The extensive study from cells grown in 2D most certainly contributed  
109 to limit the identification of EMT regulatory factors to components forming the « tip of the  
110 iceberg », leaving hidden other potential actors. This limitation led us to study how EMT  
111 induction can promote pro-invasive features from colon cancer cells, with the aim of  
112 revealing novel EMT-related molecular vulnerabilities, potentially useful as new  
113 prognostic factors and/or novel targets.

114 For this, we used a 3D *in vitro* model and a timeline exposition to the EMT-  
115 inducing cocktail to study reversible genes involved in EMT and Mesenchymal-to-  
116 Epithelial Transition (MET) programs. From the genes identified, we build a metagene  
117 and tested its prognostic value in a large database of CRC samples, annotated with  
118 clinical data. Finally, still using these genes, we searched for FDA approved drugs that  
119 might influence the EMT-MET programs and found that statins alter the execution of the  
120 EMT program.

## 121 **MATERIAL & METHODS**

### 122 **Cell culture**

123 HT29 cells were obtained from the ATCC<sup>®</sup> Human Cell Lines (ATCC, Manassas, VA,  
124 USA) and cultured using Dulbecco Modified Eagle Medium (DMEM, GIBCO, Waltham,  
125 MA, USA) with 10% Fetal Calf Serum (FCS, Eurobio, Les Ulis, France) in 5% CO<sub>2</sub> at  
126 37°C. Classical 2D cell cultures were seeded in Falcon<sup>®</sup> 6-well, whereas spheroids  
127 culture were seeded in Cell Carrier Spheroid ULA 96-well Microplates™ (PerkinElmer,  
128 Waltham, MA, USA). For EMT induction, cells were plated 2 days in regular media  
129 before to be supplemented with StemXVivo<sup>®</sup> EMT Inducing Media Supplement (R&D,  
130 Minneapolis, MN, USA) at 1X concentration for the indicated time. Cells were treated  
131 with lovastatin and simvastatin (Sellekchem, Houston, TX, USA) at indicated  
132 concentration and time.

133

### 134 **Western Blotting**

135 Cells were scraped and lysed in RIPA buffer (150 mM NaCl, 50 mM Tris, pH 7.4, 1%  
136 Triton X-100, 0.1% SDS, 1% sodium deoxycholate) supplemented with HALT protease  
137 inhibitor 1X (Thermo Fisher Scientific, Waltham, MA, USA), incubated for 10 min on ice,  
138 and centrifuged at 13800 g. Supernatants were collected and quantified with Bradford  
139 Protein Assay kit (Thermo Fisher Scientific, Waltham, MA, USA). NuPAGE<sup>®</sup> LDS  
140 Sample Buffer (Invitrogen, Carlsbad, CA, USA) was added to samples to 1X final  
141 concentration. Samples were boiled at 95 °C for 5 min, loaded into  
142 acrylamide/bisacrylamide gels and transferred to nitrocellulose membrane (GE  
143 Healthcare, Chicago, IL, USA). Membranes were blocked using PBS 0.1% tween 5% fat  
144 free milk for at least 30 min and incubated with primary antibodies diluted in PSB 5%  
145 normal horse serum overnight at 4 °C (**Table S1**). The following day, membranes were  
146 incubated with HRP coupled secondary antibodies diluted in PSB 5% normal horse  
147 serum for 1 h at room temperature (**Table S1**). Blots were visualized by addition of ECL

148 Western Blotting Substrate (Thermo Fisher Scientific, Waltham, MA, USA) following  
149 manufacturer's instructions. Blots were revealed using the imaging system ChemiDoc  
150 MP (BioRad, Hercules, CA, USA).

151

## 152 **RNA extraction**

153 Total RNA was extracted from the HT29 spheroids using the RNeasy Mini Kit (Qiagen,  
154 Hilden, Germany) following the manufacturer's instruction. The quality was tested using  
155 an Agilent Bioanalyzer (Agilent, Santa Clara, CA, USA).

156

## 157 **Gene expression profiling of treated and untreated HT29 spheroids**

158 Profiling was done using Affymetrix GeneChip HuGene 2.0 ST microarrays according to  
159 manufacturer instructions (Affymetrix, Thermo Fisher, Waltham, MA, USA). Expression  
160 data were analyzed by Robust Multichip Average (RMA) [26] in R using Bioconductor  
161 and associated packages. Prior to analysis, log<sub>2</sub>-transformed data were filtered out to  
162 exclude poorly expressed genes, defined as genes having a median expression level  
163 across all samples lower than the first quartile range. Data filtering resulted in 17,421  
164 annotated genes.

165 Unsupervised analysis, applied to the 3,131 genes with standard deviation (SD)>0.25,  
166 was performed with the Cluster program [27] using Pearson correlation and average  
167 linkage clustering as parameters. Results were displayed using TreeView program [27].  
168 Robustness of clusters was assessed with the R-package pvclust [28] with identical  
169 clustering parameters and 100 bootstrap replications. Ontology analysis of the gene  
170 clusters was based on GO biological processes of the Database for Annotation,  
171 Visualization and Integrated Discovery (DAVID; <http://david.abcc.ncifcrf.gov/>). The  
172 Consensus Molecular Subtype (CMS) classification [29] was applied to each cell culture  
173 condition by using the CMScaller tool from Eide et al. [30], providing a CMS score for  
174 each subtype (CMS1, CMS2, CMS3, and CMS4) to each condition.

175 Supervised analyses between the different cell culture conditions was applied by using  
176 Gene Set Enrichment Analysis (GSEA) (<http://www.broadinstitute.org/gsea/>) in order to  
177 identify the differential biological pathways. Analysis was focused on the 50-hallmark  
178 gene sets from the MSigDB v7.0 Molecular Signatures Database ([https://www.gsea-  
179 msigdb.org/gsea/msigdb](https://www.gsea-msigdb.org/gsea/msigdb)). We used the class differential metric to rank the filtered  
180 genes, weighted enrichment statistic for computing enrichment score (ES) of each gene  
181 set tested and 1000 permutations to evaluate significance as parameters for the GSEA.  
182 Significant gene sets were defined by a False Discovery Rate (FDR)-corrected p-value  
183 <0.01. Metagenes from the significant gene sets were computed as the mean  
184 expression of core genes defined by the GSEA analysis.

185

## 186 **Gene expression profiling of human cancer colon samples**

187 We built a large database gathering our own data set and 10 publicly available sets as  
188 described [26]. These latter had been collected from the National Center for  
189 Biotechnology Information (NCBI)/Genbank GEO, ArrayExpress and TCGA databases  
190 (**Table S2**). Samples had been profiled using DNA microarrays (Affymetrix, Thermo  
191 Fisher, Waltham, MA, USA) or Illumina RNA sequencing (United kingdom, Cambridge).  
192 The whole data set included 2,239 primary colon cancer samples in the final analysis.  
193 Their clinicopathological characteristics are summarized in **Table 1**. The pre-analytic  
194 data processing and data analysis were done as previously described [26]. The CMS  
195 classification and the metagenes identified by supervised analyses in the HT29 cells  
196 were applied to each data set separately [29]. For these latter, the natural score of 0  
197 was used as threshold to define a sample as “positive” (score>0) or “negative”  
198 (score<0).

199

## 200 **Connectivity Map interrogation**



201 Finally, in order to identify potential therapies, we applied the Connectivity Map (CMap)  
202 analysis [31]. This analysis contains a perturbation-driven gene expression dataset of  
203 over a million of gene expression signatures associated with molecule compounds and  
204 genetic perturbations treatment on human cells. CMap (<https://clue.io/cmap>) searched  
205 for, among the L1000 signatures, the perturbation's signatures that give significant  
206 correlation with those genes included in our two interest metagenes given by  
207 connectivity scores. The tested signatures were limited to those with a well-defined  
208 mechanism of action of treatment compounds, corresponding to 10,847 signatures of  
209 3,248 drugs through 57 cultured human cell lines. The significance threshold of the  
210 normalized connectivity score (ncs) was adjusted p-value <0.001. Because each drug  
211 has been used through multiple different culture conditions, we aggregated the  
212 significant signatures by drug class, computed for each class the average of normalized  
213 connectivity scores (average ncs) and assessed its statistical significance using one  
214 sample Student t-test.

215

## 216 **Statistical analysis**

217 Correlations between the "EMT-CHL model"-based classes and the clinicopathological  
218 variables were calculated with the Student's t-test for the continuous variables and the  
219 Fisher's exact test for the binary variables. The survival endpoint was relapse-free  
220 survival (RFS) calculated from the date of diagnosis until the date of relapse. The  
221 follow-up was measured from the date of diagnosis to the date of last news for event-  
222 free patients. Survival was calculated using the Kaplan-Meier method and curves were  
223 compared with the log-rank test. Univariate and multivariate analyses were done using  
224 Cox regression analysis (Wald test). The variables tested in univariate analysis included  
225 patients' age (> vs. ≤50 years) and gender (male vs. female), anatomic location  
226 (proximal vs. distal colon), pathological stage (2, 3, 4 vs. 1), pathological grade (2, 3 vs.  
227 1), CMS molecular subtypes (CMS2, CMS3, CMS4 vs. CMS1), and the "EMT-CHL

228 model"-based classes ("high-risk" vs. "low-risk"). Multivariate analysis incorporated all  
229 variables with a p-value inferior to 5% in univariate analysis. The likelihood ratio (LR)  
230 tests were used to assess the prognostic information provided beyond that of each  
231 metagene included in the Cox model, assuming a  $\chi^2$  distribution. Changes in the LR  
232 values (LR- $\Delta\chi^2$ ) quantified the relative amount of information of one Cox model  
233 compared with another. In order to build a prognostic Cox model for RFS combining our  
234 two metagenes, we randomly split the 1,837 informative primary samples in two sets,  
235 training and validation sets. The training set was composed of a quarter of the samples  
236 (n=450) and allowed to build the model. This model was then applied to the validation  
237 set composed of the 1,387 remaining samples, to estimate the robustness of the  
238 predictor. All statistical tests were two-sided at the 5% level of significance. Statistical  
239 analysis was done using the survival package (version 2.30) in the R software (version  
240 3.5.2).

241 **RESULTS**

242 **The EMT-inducing cocktail induces reversible loose micro-tissues, consistent**  
243 **with EMT and EMT-MET-like programs**

244 The EMT-inducing cocktail used for this study is a potent inducer of EMT [18, 20,  
245 32-35]. However, growth in 2D on plastic dishes offers unnatural growth kinetics and  
246 cells attachment, thus altering adhesion and related signaling pathways, and potentially  
247 biasing and/or masking EMT-induced signals. To study EMT induction in a more  
248 physiologic and dynamic model, we looked at the reversible effects of an EMT-inducing  
249 cocktail on cells grown in 3D as spheroids. We induced EMT on several colon cancer  
250 cell lines (HT29, HCT116, SW480). The most striking phenotype was observed with the  
251 HT29 colon cancer cell line, and we choose to continue with them. We used three  
252 conditions on HT29 spheroids: HT29 spheroids grown without any treatment (Baseline  
253 condition), HT29 spheroids exposed to the EMT-inducing cocktail for 5 days to induce  
254 EMT, and HT29 spheroids exposed to the EMT-inducing cocktail for 5 days, washed,  
255 then incubated for an additional 4 days without any treatment to mimic a sequential  
256 EMT followed by a MET process (**Figure 1A**).

257 In the absence of any specific treatment (Baseline), the spheroids continued to  
258 grow as dense spheroids during the whole protocol (**Figure 1B, top row**). When the  
259 EMT-inducing cocktail was added to the media (EMT condition) the spheroids became  
260 loose, with round cells at the periphery of the spheroid core, already after 3 days of  
261 treatment (**Figure 1B, middle row**). In the EMT-MET condition, the first 5 days were  
262 similar to the EMT condition, then during the following 3 days, *i.e.* after the removal of  
263 the EMT-inducing cocktail (MET-like program), the individualized round cells  
264 progressively reintegrated the spheroids core to form a homogeneous and compact  
265 spheroid (**Figure 1B, bottom row**).

266 We verified that the EMT-like phenotype induced by the EMT-inducing cocktail  
267 actually induced known EMT factors. We studied key molecules of EMT at the protein

268 level by western blotting. We compared Baseline microtissues samples to EMT and  
269 EMT-MET samples. The EMT-inducing cocktail induced the expression of specific  
270 mesenchymal proteins such as Fibronectin, ZEB1 and Vimentin (**Figure 1C**). All these  
271 markers went back to their respective baseline after removal of the EMT-inducing  
272 cocktail (*i.e.* Baseline condition and EMT-MET are similar). Conversely and as  
273 expected, the epithelial marker OCCLUDIN was downregulated during the EMT  
274 process.

275 Thus the EMT-inducing cocktail induced reversible macroscopic changes,  
276 phenotypically compatible with an EMT program induction.

277

278

## 279 **Transcriptomic analysis confirms the activation of EMT and EMT-MET programs** 280 **in spheroids treated with the EMT-inducing cocktail**

281 We surmised that the effect of the EMT-inducing cocktail was not limited to  
282 known EMT markers. To identify broad biological pathways activated by the EMT-  
283 inducing cocktail in treated spheroids, we performed DNA microarray analyses  
284 (Affymetrix™ GeneChip Human Gene 2.0 ST Assay) from the three conditions  
285 described above (Baseline, EMT, and EMT-MET, **Figure 1A**) and compared their  
286 expression profiles. Analyses were done at day 5 for Baseline and EMT samples and at  
287 day 7 for EMT-MET samples. Each condition was tested in triplicate. Unsupervised  
288 hierarchical clustering revealed, as expected, three distinct and coherent clusters,  
289 corresponding to each of the three conditions tested: Baseline, EMT, and EMT-MET  
290 (**Figure 1D**). The EMT and EMT-MET conditions were closer to each other than to the  
291 Baseline condition (**Figure 1D**). This is coherent with the fact that at day 7, spheroids  
292 were not fully back to baseline yet (**Figure 1B**). Visual inspection of gene clusters  
293 revealed two clusters, thereafter designated 1 and 2, that were deregulated from the  
294 Baseline condition to the EMT condition and showed opposite deregulation from the

295 EMT condition to the EMT-MET condition. Cluster 1 was upregulated in EMT condition  
296 and downregulated in EMT-MET condition: it included 198 genes with minimal Pearson  
297 correlation equal to 0.74. In term of ontologies, the DAVID GO biological processes  
298 associated with this cluster included cell migration ( $p=1.15E-04$ ), extracellular matrix  
299 organization ( $p=1.78E-04$ ), regulation of cell adhesion ( $p=7.87E-05$ ) and wound healing  
300 pathways ( $p=3.84E-03$ ). By contrast, Cluster 2 was downregulated in EMT condition  
301 and upregulated in EMT-MET condition: it included 296 genes with minimal Pearson  
302 correlation equal to 0.75. The GO biological processes represented in this cluster were  
303 related to cholesterol biosynthetic process ( $p=4.42E-20$ ), lipid metabolism ( $1.6E-02$ ) and  
304 metabolic pathways ( $p=1.22E-02$ ) (**Figure 1D, Table S3**). Thus, transcriptional analysis  
305 of the EMT and EMT-MET programs induced in the spheroids revealed a list of  
306 candidates and associated molecular pathways whose expression was modulated and  
307 reversible. Expected pathways related to cell migration and adhesion, known to be  
308 central to this reversible phenomenon, validated the biological relevance of our *in vitro*  
309 model that also revealed unexpected genes and pathways.

310

#### 311 **Spheroids treated with the EMT-inducing cocktail shift toward the mesenchymal** 312 **consensus molecular subtypes (CMS4)**

313 The CMS classification distinguishes four subtypes of CRC based on the tumor's  
314 prominent biological profiles, each subtype having a defined prognosis: the CMS1  
315 microsatellite instability/immune subtype (hyper-mutated, microsatellite unstable and  
316 strong immune activation), the CMS2 canonical subtype (epithelial with marked WNT  
317 and MYC signaling activation), the CMS3 metabolic subtype (epithelial and neat  
318 metabolic dysregulation), and the CMS4 mesenchymal subtype (prominent TGF $\beta$   
319 activation, stromal invasion and angiogenesis) [36]. We surmised that genes expressed  
320 in the CMS4 mesenchymal class may be enriched in the EMT-inducing cocktail treated  
321 spheroids, but neither in the Baseline nor in the EMT-MET spheroids.

322 The CMS classification applied to the 3 cell culture conditions (Baseline, EMT  
323 and EMT-MET conditions) defined a CMS score for each subtype (CMS1, CMS2,  
324 CMS3, and CMS4) and for each cell culture condition (Baseline, EMT and EMT-MET  
325 conditions). As shown in **Figure 1E**, the prevalent score of Baseline samples  
326 corresponded to the CMS3 class (mean CMS3 score = 0.332). This result is coherent  
327 with a previous CMS classification of HT29 cells [37]. When compared with Baseline  
328 conditions, EMT samples showed a decrease of the CMS3 score ( $p=1.22E-02$ ) and an  
329 increase of the CMS4 score ( $p=9.58E-03$ ). Enrichment in CMS4 score (*i.e.*  
330 mesenchymal genes) was concordant with the induction of EMT. After the EMT-  
331 inducing cocktail removal (EMT-MET samples), the score for the CMS4 class  
332 decreased, as expected, while the score for the CMS2 class increased compared to the  
333 Baseline condition ( $p=2.57E-02$ ). This result showed that a pro-epithelial program  
334 (starting with a switch toward the CMS2 subtype) was re-activated once the EMT-  
335 inducing cocktail was removed from the culture. Altogether, the results showed that  
336 HT29 cells grown as spheroids and exposed to an EMT inducer activated a physiologic  
337 pro-mesenchymal transcriptomic program (the shift toward the CMS4 mesenchymal  
338 subtype) and that this process was reversible toward a pro-epithelial phenotype when  
339 the EMT inducer was removed. This observation further validated the relevance of our  
340 *in vitro* model.

341  
342 **EMT genes, Bile Acid Metabolism and Cholesterol Homeostasis hallmark gene**  
343 **sets are affected during the EMT and EMT-MET programs**

344 To identify the biological pathways reversibly altered during the EMT process, we  
345 did a supervised analysis between the different cell culture conditions. Two  
346 comparisons were done: EMT *versus* Baseline samples (EMT induction), and EMT-  
347 MET *versus* EMT samples (MET induction). From these signatures, we used GSEA  
348 applied to the 50-hallmark gene sets from the MSigDB Molecular Signatures Database.

349 Our objective was to identify and select gene sets that showed an opposite pattern of  
350 variation in those two comparisons. Sixteen gene sets were differentially regulated at  
351 least in one comparison (q-value<1%) (**Figure 2A, grey background**), and three of them  
352 were significantly up- or downregulated in the EMT samples and returned to baseline  
353 levels in the EMT-MET samples (**Figure 2A, white background**). The “*Epithelio-*  
354 *Mesenchymal transition*” gene set was composed of 23 core genes upregulated in the  
355 EMT compared to Baseline samples (q-value = 5.61E-03) and 39 core genes  
356 downregulated in the EMT-MET compared to EMT samples (q-value < 1.00E-03) (**Table**  
357 **S4, columns 3 and 10 respectively, orange background**). The *Bile Acid Metabolism*  
358 gene set was composed of 33 core genes downregulated in the EMT compared to  
359 Baseline samples (q-value = 9.16E-03) and 33 core genes upregulated in the EMT-MET  
360 compared to EMT samples (q-value = 1.62E-03) (**Table S4, columns 3 and 10**  
361 **respectively, green background**). The *Cholesterol Homeostasis* gene set was composed  
362 of 31 core genes downregulated in the EMT samples compared to Baseline samples (q-  
363 value <1.00E-03) and 28 core genes upregulated in the EMT-MET compared to EMT  
364 samples (q-value= 2.64E-03) (**Table S4, columns 3 and 10 respectively, yellow**  
365 **background**). Among the core genes: 14 genes were retained in the “*Epithelio-*  
366 *Mesenchymal transition*” gene set, 17 in the “*Bile Acid Metabolism*” gene set, and 21 in  
367 the “*Cholesterol Homeostasis*” gene set, representing a total of 52 genes (**Figure 2B,**  
368 **Table S4 column 18**).

369 We built 3 independent metagenes from each of these three core gene sets. As  
370 shown in **Figure 2C**, each metagene was robust enough to distinguish the HT29  
371 samples according to their respective condition (Baseline, EMT, and EMT-MET): the  
372 “*Epithelio-Mesenchymal transition*” metagene score was the highest in the EMT  
373 samples compared to the Baseline samples (p-value=3.22E-06) and to the EMT-MET  
374 samples (p-value=1.25E-05). The “*Bile Acid Metabolism*” and the “*Cholesterol*  
375 *Homeostasis*” metagene scores were the lowest in the EMT samples compared to the

376 Baseline samples (p-value=2.08E-04 and p-value=1.70E-05 respectively) and to the  
377 EMT-MET samples (p-value=2.08E-04 and p-value=1.70E-05, respectively). Altogether,  
378 this procedure allowed us to identify 52 genes reversibly regulated during the EMT and  
379 the EMT-MET programs. Those genes, when separated into three distinct metagenes  
380 based on their hallmark ontology, could also individually distinguished an active from an  
381 inactive EMT program in tumor cells.

382

### 383 ***In vitro* derived metagenes show independent prognostic value in colon cancer**

384 Given the known link between EMT and the metastatic process, we assessed the  
385 prognostic value of each metagene (positive *versus* negative) in a large gene  
386 expression database of untreated human colon cancer samples (**Table S2**). This base  
387 included 2,239 clinically annotated primary colon tumors, including 1,837 with available  
388 Recurrence-Free Survival (RFS) data. In univariate analysis, the “*Bile Acid Metabolism*”  
389 metagene was not prognostic (**Figure 3A**). By contrast, the positive “*Epithelio-*  
390 *Mesenchymal transition*” metagene (HR=1.37, [95CI 1.14-1.64]; p=6.28E-04, Wald test)  
391 and negative “*Cholesterol Homeostasis*” metagene (HR=1.25, [95CI 1.04-1.49];  
392 p=1.64E-02, Wald test) were associated with shorter RFS, and showed independent  
393 prognostic value in multivariate analysis (**Figure 3B**). The **Figure 3C** shows the Kaplan-  
394 Meier curves for RFS in four groups defined by each significant metagene: the 5-year  
395 RFS was 77% (95%CI 73-82) in the “*Epithelio-Mesenchymal transition*”-  
396 negative/“*Cholesterol Homeostasis*”-positive group, 71% (95%CI 67-77) “*Epithelio-*  
397 *Mesenchymal transition*”-negative/“*Cholesterol Homeostasis*”-negative group, 70%  
398 (95%CI 65-75) in the “*Epithelio-Mesenchymal transition*”-positive/“*Cholesterol*  
399 *Homeostasis*”-positive group, and 65% (95%CI 60-70) in the “*Epithelio-Mesenchymal*  
400 *transition*”-positive/“*Cholesterol Homeostasis*”-negative group (p=4.61E-04; log-rank  
401 test). Such prognostic complementarity was confirmed using the likelihood ratio (LR)  
402 test (**Table S5**): the “*Cholesterol Homeostasis*” metagene added prognostic information



403 to that provided by “*Epithelio-Mesenchymal transition*” metagene ( $\Delta\text{LR-X}^2=5.21$ ,  
404  $p=2.24\text{E-}02$ ), and the “*Epithelio-Mesenchymal transition*” metagene added prognostic  
405 information to that provided by the “*Cholesterol Homeostasis*” metagene ( $\Delta\text{LR-}$   
406  $\text{X}^2=13.26$ ,  $p=2.72\text{E-}04$ ).

407  
408 ***The model combining the “Epithelial Mesenchymal Transition” and the***  
409 ***“Cholesterol Homeostasis” metagenes is a robust prognostic factor for RFS in***  
410 ***CRC***

411 Based on these results, we built a multigene model combining the “*Epithelial*  
412 *Mesenchymal Transition*” (14 genes) and the “*Cholesterol Homeostasis*” (21 genes)  
413 metagenes, thereafter designated “EMT-CHL model”. We randomly split the 1,837  
414 informative primary samples in two sets: a training set composed of a quarter of the  
415 samples ( $n=450$ ) to build the model, and a validation set composed of the 1,387  
416 remaining samples (**Table 2**) to test its robustness. As expected, in the training set, the  
417 model showed a difference between the 5-year RFS of the “low-risk” class (75% [CI95  
418 69-83];  $n=225$ ) and the “high-risk” class (66% [CI95 59-74];  $n=225$ ;  $p=9.93\text{E-}03$ , log-  
419 rank test; (**Figure 3D, left panel**). Importantly, the model maintained its prognostic value  
420 in the validation set, with 74% 5-year RFS in the “low-risk” class (CI95 70-78;  $n=672$ )  
421 *versus* 68% in the “high-risk” class (CI95 64-72;  $n=71$ ;  $p=1.68\text{E-}23$ , log-rank test)  
422 (**Figure 3D, right panel**).

423 The correlation of the “EMT-CHL model”-based classes with clinicopathological  
424 variables in the validation set are shown in **Table 2**. When compared with the “low-risk”  
425 class, the “high-risk” class was associated with more female ( $p=2.0\text{E-}03$ , Fisher’s exact  
426 test), more pathological stage 3 ( $p=3.0\text{E-}04$ , Fisher’s exact test), and more CMS1 and  
427 CMS4 subtypes ( $p=3.5\text{E-}33$ , Fisher’s exact test). We then compared the prognostic  
428 value of our “EMT-CHL model” with that of other clinicopathological factors in the  
429 validation set in univariate and multivariate analyses (**Table 3**). The other variables

430 significant in univariate analysis were the pathological stage ( $p=3.1E-10$ ) and the CMS  
431 classification ( $p=2.3E-03$ , Wald test). In multivariate analysis, the pathological stage  
432 and our multigene model ( $p=4.0E-02$ , Wald test) remained significant but not the CMS  
433 classification. Altogether these analyses showed that our “EMT-CHL” model was a  
434 robust and independent prognostic factor for RFS in primary colon cancer.

435  
436 ***CMap analysis revealed inhibitors and antagonists that might affect the EMT and***  
437 ***EMT-MET programs***

438 We then searched for drugs that might affect (promote or inhibit) the plasticity of  
439 the EMT and/or EMT-MET programs. We submitted the 35 genes of the EMT-CHL  
440 model to Connectivity Map (CMap), which reports the transcriptional responses of  
441 human cells to a variety of chemical or genetic perturbations [31]. The resulting  
442 connectivity scores reflect the level of agreement between the tested signature and the  
443 L1000 profiles/signatures. Analysis was limited to the 10,847 signatures related to  
444 treatment compounds with known mechanism of action through 57 cultured human cell  
445 lines: 761 signatures had significant correlation (normalized connectivity score (ncs) *i.e.*  
446 adjusted  $p$ -value  $<0.001$ ) with the “EMT-CHL” model genes through 47 human cell lines  
447 over 309 drugs compounds (representing 145 drug classes; **Table S6**). We aggregated  
448 the significant signatures by drug class and computed the average ncs for each class:  
449 98 drug classes were significant. **Table 4** shows the top 15 drug classes identified,  
450 which includes antagonists/inhibitors of Dopamine receptor, EGFR, Serotonin receptor,  
451 PDGFR, BCR-ABL, ABL, Histamine receptor, KIT, Adrenergic receptor, HMG-CoA  
452 reductase (HMGCR), SRC, Calcium channel, Tricyclic antidepressant, Estrogen  
453 receptor, and VEGFR. All connectivity scores were negatively correlated with our  
454 signature, suggesting that these drugs might interfere with the EMT-MET process.

455

456 ***Blocking enzymes from the cholesterol pathway prevents the execution of the***  
457 ***EMT-MET program***

458 We first confirmed that HMGCR and DHCR7 were downregulated during the  
459 EMT process and came back to a control level during the MET process due to release  
460 of the EMT-inducing treatment (**Figure S1**). From the candidates identified above, we  
461 chose to test the HMGCR inhibitors, which directly target the cholesterol pathway. We  
462 selected two statins, Lovastatin and Simvastatin, and applied them on 2-days-old  
463 organoids (**Figure 4A**). Even at high concentration of each statin, we did not observe  
464 any change in the phenotypical aspect of the microtissues when added alone (**Figure**  
465 **4B, C** for *Simvastatin*) or in co-treatment with the EMT-inducing cocktail (*Data not*  
466 *shown*) compared to the EMT-inducing factor alone. However, when statins were added  
467 after a pre-treatment with the EMT-inducing cocktail, *i.e.* during the EMT-MET program  
468 (**Figure 4D**), we observed that the treated spheroids maintained a loose EMT-like  
469 phenotype instead of reversing to dense spheroids, as those observed with the Baseline  
470 situation (**Figure 4E, F**). This result showed that inhibiting the cholesterol pathway after  
471 EMT induction prevented the completion of the MET program, in the absence of EMT  
472 inducing factors, highlighting the importance of the regulation of the cholesterol pathway  
473 during the EMT-MET programs.

474

## 475 Discussion

476 EMT implication in oncogenesis and metastasis has been extensively studied  
477 showing the role of many transcription (e.g. TWIST) and secreted factors (e.g.  
478 TGF $\beta$ ). However, progress is necessary to better understand this implication and to  
479 provide therapeutic targets [9, 22, 23, 38]. The novelty of our study rely on the  
480 combination of the broad induction of EMT using an EMT-inducing cocktail, a 3D model  
481 and the timeline approach of EMT-MET induction programs.

482 This allowed the identification of two sets of genes reversibly regulated during  
483 either the induction of EMT or the EMT-MET program. The two key pathways retained  
484 for our model comprised genes from the EMT pathway, as expected, but also more  
485 surprisingly, genes from the cholesterol pathway. When combined as a multigene  
486 model, they showed an independent prognostic value in a large dataset of patients with  
487 primary colorectal cancer, highlighting the clinical relevance of our finding.

488 .

489 When analyzed in detail, we found that the 14 genes related to the EMT pathway  
490 and reversibly modified in response to the EMT-inducing cocktail were genes induced  
491 by TGF $\beta$  (*PMEPA1*, *CTGF*, *TAGLN*, *CYR61* ...). They have also been involved in cell  
492 migration (*TNC*, *IL8*, *TAGLN*, *FLNA*, *SERPINE1*, *MYL9*, *CYR61*, *GPC1*...) in various  
493 cancers. At least four of them promoted colorectal liver metastasis through  
494 enhancement of the EMT program (*THBS1*, *TAGLN*, *ITGA2*, *FLNA*). Several of them  
495 code for surface glycoproteins or integrin-related molecules (*PMEPA1*, *TAGLN*,  
496 *SERPINE1*, *THBS1*, *GPC1*). Some or a combination of these genes might be used as  
497 biomarkers for EMT to identify CRC patients potentially more at risk to relapse [39-46].

498 The involvement of the cholesterol pathway inhibition (during EMT) and re-  
499 activation (during EMT-MET) is a new and intriguing finding. The 21 genes of the  
500 cholesterol metagene code for most (if not all) enzymes responsible for the synthesis of  
501 cholesterol (highlighted in red in **Figure 5**). Cholesterol is essential for cell function and

502 viability. It is a component of the plasma membrane and lipid rafts, a signaling molecule  
503 (ligand for estrogen-related receptor alpha (ESRRA)), and a precursor for steroid  
504 hormones, Vitamin D and bile acids. The bile acid pathway was also found  
505 downregulated during EMT and activated during the EMT-MET programs but did not  
506 have prognostic value in our study. Many reports have suggested that cholesterol  
507 pathway activation is important for stem cells maintenance in tissues but also for other  
508 pro-metastatic function, such as proliferation, survival and resistance to treatment [47].  
509 All these features are associated with pejorative prognosis. Cholesterol synthesis is  
510 enhanced in cancer cells compared to normal cells [48, 49]. Additionally, patients with  
511 high cholesterol levels have an increased risk for many cancers [48, 49]. But thus far,  
512 clinical trials with HMGCR inhibitors (statins) have had mixed results [50, 51]. In our  
513 case, activation of the cholesterol synthesis pathway tended to be of better prognosis.  
514 Due to its multiple biological roles including in tissue homeostasis, cholesterol might  
515 have several roles depending on conditions, cells type or timing. Changes in one of  
516 these variables might reveal different functionalities. Compared to previous results, our  
517 dynamic model enriched the “EMT field” by highlighting the role of cholesterol regulation  
518 in relationship with the triggering of cell detachment signal and cell plasticity. Phenotypic  
519 plasticity may provide cancer cells with increased adaptability and resistance, enabling  
520 them to respond to a variety of external cues and physiological stresses, including EMT  
521 signals. In addition to highlighting the reversibility of the cholesterol pathway activation  
522 during EMT-MET programs, we also showed that *in vitro* blockade of the cholesterol  
523 pathway altered the execution of the EMT-MET program. One hypothesis is that, in the  
524 context of tumor cell motility and migration, EMT requires lowering the synthesis of  
525 cholesterol to ensure the destabilization of lipid rafts and/or to allow more flexibility in  
526 cell membrane for migration. In this line, in breast and hepatocellular carcinomas, CD44  
527 affinity for cholesterol-rich lipid rafts and retention inside lipid rafts prevent migration [52-  
528 56]. Also, statins induce disruption of lipid rafts, impairing tumor cell adhesion, but

529 enhance invasive and metastatic ability of cancer cells [52-56]. The molecular  
530 mechanism involved remains however to be fully elucidated. Altogether, these results  
531 suggest that beside or through their lipid lowering property, factors such as statins might  
532 also influence complex cell biological programs, during oncogenesis such as EMT.

533         Similar findings (simultaneous opposite involvement of EMT and cholesterol  
534 pathways) in pancreatic ductal adenocarcinoma (PDAC) revealed that cholesterol  
535 pathway inhibition induces TGF $\beta$  signaling and promotes basal differentiation [21]. More  
536 specifically, the disruption of cholesterol biosynthesis by *Nsdhl* knockout (in mice) or  
537 treatment with statins (in mice and in humans) induces the switch from a glandular to a  
538 squamous PDAC subtype (mesenchymal subtype). In line with this, a previous study  
539 suggested that human tumor cells belonging to the quasi-mesenchymal/squamous/  
540 basal subtype of PDAC utilize transcriptionally-dominated programs to lose their  
541 epithelial phenotype during EMT, while those belonging to the classical/pancreatic  
542 progenitor/ADEX subtype rely on protein re-localization to lose their epithelial phenotype  
543 during EMT [57]. This recent discovery now reveals that this glandular to squamous  
544 PDAC switch can occur *via* the activation of SREBP1, which induces TGF $\beta$ 1  
545 expression, autocrine TGF $\beta$ -SMAD2/3 signaling and EMT. In line with this major finding,  
546 we showed that inducing EMT in our model can switch a cell line from a CMS3 subtype  
547 to a CMS4 mesenchymal subtype using a transcriptionally-dominated program [36],  
548 connecting this switch to a more pejorative prognosis. Accordingly, we found that the  
549 CMS4 subtype [36] was enriched in the “high-risk” prognostic group, *i.e* “EMT high,  
550 Cholesterol down”. It is thus possible that a general mechanism promoting  
551 basal/squamous/mesenchymal differentiation with the transcriptional downregulation of  
552 the cholesterol pathway and the upregulation of TGF $\beta$  related genes occurs in multiple  
553 tumor types (**Figure 5**). Moreover, it was reported that TGF $\beta$ -induced mitotic defects in  
554 proliferating cells are reversible upon its withdrawal, whereas the acquired genomic  
555 abnormalities persist, leading to increased tumorigenic phenotypes. Tumor cells

556 differentiation might thus result from a different degree of EMT depending on several  
557 factors, genetic and non-genetic such as the microenvironment and the various  
558 treatments [58].

559 In parallel, and in line with this hypothesis, it would be of interest to identify  
560 patients who received statins prior to their diagnosis of colorectal cancer and test if  
561 these patient's tumors are more of the CMS4 subtype. As shown in the PDAC study,  
562 this would suggest that the lowering of the cholesterol pathway can indeed influence the  
563 subtype of the growing carcinoma, which would be a major discovery in the field. Our *in*  
564 *vitro* data however suggested that cholesterol lowering effects, notably when using  
565 statins, occurs only during a specific window to antagonize the MET program. We  
566 cannot exclude that a feedback loop between EMT and cholesterol pathways might also  
567 exist, which will add a new layer of complexity to this already intricate subject.

568 **References**

569

- 570 1. Wang, J., et al., *Metastatic patterns and survival outcomes in patients with stage IV colon cancer: A*  
571 *population-based analysis*. *Cancer Med*, 2020. **9**(1): p. 361-373.
- 572 2. Lamouille, S., J. Xu, and R. Derynck, *Molecular mechanisms of epithelial-mesenchymal transition*.  
573 *Nat Rev Mol Cell Biol*, 2014. **15**(3): p. 178-96.
- 574 3. Batlle, E., et al., *The transcription factor snail is a repressor of E-cadherin gene expression in*  
575 *epithelial tumour cells*. *Nat Cell Biol*, 2000. **2**(2): p. 84-9.
- 576 4. Cano, A., et al., *The transcription factor snail controls epithelial-mesenchymal transitions by*  
577 *repressing E-cadherin expression*. *Nat Cell Biol*, 2000. **2**(2): p. 76-83.
- 578 5. Yoshida, G.J. and H. Saya, *Molecular pathology underlying the robustness of cancer stem cells*.  
579 *Regen Ther*, 2021. **17**: p. 38-50.
- 580 6. Bragado, P., et al., *TGF-beta2 dictates disseminated tumour cell fate in target organs through TGF-*  
581 *beta-RIII and p38alpha/beta signalling*. *Nat Cell Biol*, 2013. **15**(11): p. 1351-61.
- 582 7. Xu, J., S. Lamouille, and R. Derynck, *TGF-beta-induced epithelial to mesenchymal transition*. *Cell*  
583 *Res*, 2009. **19**(2): p. 156-72.
- 584 8. Jayachandran, J., H. Srinivasan, and K.P. Mani, *Molecular mechanism involved in epithelial to*  
585 *mesenchymal transition*. *Arch Biochem Biophys*, 2021: p. 108984.
- 586 9. Thiery, J.P. and J.P. Sleeman, *Complex networks orchestrate epithelial-mesenchymal transitions*. *Nat*  
587 *Rev Mol Cell Biol*, 2006. **7**(2): p. 131-42.
- 588 10. Kanazawa, T., et al., *TLS/FUS-ERG fusion gene in acute lymphoblastic leukemia with*  
589 *t(16;21)(p11;q22) and monitoring of minimal residual disease*. *Leuk Lymphoma*, 2005. **46**(12): p.  
590 1833-5.
- 591 11. Dissanayake, S.K., et al., *The Wnt5A/protein kinase C pathway mediates motility in melanoma cells*  
592 *via the inhibition of metastasis suppressors and initiation of an epithelial to mesenchymal*  
593 *transition*. *J Biol Chem*, 2007. **282**(23): p. 17259-71.
- 594 12. Chruscik, A., V. Gopalan, and A.K. Lam, *The clinical and biological roles of transforming growth*  
595 *factor beta in colon cancer stem cells: A systematic review*. *Eur J Cell Biol*, 2018. **97**(1): p. 15-22.
- 596 13. Ren, J., et al., *SFRP1 inhibits epithelial-mesenchymal transition in A549 human lung*  
597 *adenocarcinoma cell line*. *Cancer Biother Radiopharm*, 2013. **28**(7): p. 565-71.
- 598 14. Chung, M.T., et al., *SFRP1 and SFRP2 suppress the transformation and invasion abilities of cervical*  
599 *cancer cells through Wnt signal pathway*. *Gynecol Oncol*, 2009. **112**(3): p. 646-53.
- 600 15. Duan, H., et al., *TET1 inhibits EMT of ovarian cancer cells through activating Wnt/beta-catenin*  
601 *signaling inhibitors DKK1 and SFRP2*. *Gynecol Oncol*, 2017. **147**(2): p. 408-417.
- 602 16. Yue, B., et al., *LncRNA-ATB mediated E-cadherin repression promotes the progression of colon*  
603 *cancer and predicts poor prognosis*. *J Gastroenterol Hepatol*, 2016. **31**(3): p. 595-603.
- 604 17. Hu, Y., et al., *Epigenetic suppression of E-cadherin expression by Snail2 during the metastasis of*  
605 *colorectal cancer*. *Clin Epigenetics*, 2018. **10**(1): p. 154.
- 606 18. Scheel, C., et al., *Paracrine and autocrine signals induce and maintain mesenchymal and stem cell*  
607 *states in the breast*. *Cell*, 2011. **145**(6): p. 926-40.
- 608 19. Tang, Y., et al., *Induction and analysis of epithelial to mesenchymal transition*. *J Vis Exp*, 2013(78).
- 609 20. Liu, Y.L., et al., *Assessing metastatic potential of breast cancer cells based on EGFR dynamics*. *Sci*  
610 *Rep*, 2019. **9**(1): p. 3395.
- 611 21. Gabitova-Cornell, L., et al., *Cholesterol Pathway Inhibition Induces TGF-beta Signaling to Promote*  
612 *Basal Differentiation in Pancreatic Cancer*. *Cancer Cell*, 2020. **38**(4): p. 567-583 e11.
- 613 22. Fazilaty, H., et al., *A gene regulatory network to control EMT programs in development and disease*.  
614 *Nat Commun*, 2019. **10**(1): p. 5115.
- 615 23. Jia, D., et al., *Testing the gene expression classification of the EMT spectrum*. *Phys Biol*, 2019. **16**(2):  
616 p. 025002.



- 617 24. Chitcholtan, K., et al., *Differences in growth properties of endometrial cancer in three dimensional*  
618 *(3D) culture and 2D cell monolayer*. Exp Cell Res, 2013. **319**(1): p. 75-87.
- 619 25. Melissaridou, S., et al., *The effect of 2D and 3D cell cultures on treatment response, EMT profile and*  
620 *stem cell features in head and neck cancer*. Cancer Cell Int, 2019. **19**: p. 16.
- 621 26. Irizarry, R.A., et al., *Exploration, normalization, and summaries of high density oligonucleotide array*  
622 *probe level data*. Biostatistics, 2003. **4**(2): p. 249-64.
- 623 27. Eisen, M.B., et al., *Cluster analysis and display of genome-wide expression patterns*. Proc Natl Acad  
624 Sci U S A, 1998. **95**(25): p. 14863-8.
- 625 28. Suzuki, R. and H. Shimodaira, *Pvclust: an R package for assessing the uncertainty in hierarchical*  
626 *clustering*. Bioinformatics, 2006. **22**(12): p. 1540-2.
- 627 29. Bertucci, F., et al., *EndoPredict predicts for the response to neoadjuvant chemotherapy in ER-*  
628 *positive, HER2-negative breast cancer*. Cancer Lett, 2014. **355**(1): p. 70-5.
- 629 30. Eide, P.W., et al., *CMScaller: an R package for consensus molecular subtyping of colorectal cancer*  
630 *pre-clinical models*. Sci Rep, 2017. **7**(1): p. 16618.
- 631 31. Subramanian, A., et al., *A Next Generation Connectivity Map: L1000 Platform and the First*  
632 *1,000,000 Profiles*. Cell, 2017. **171**(6): p. 1437-1452 e17.
- 633 32. Siddiqui, A., et al., *Thymidylate synthase is functionally associated with ZEB1 and contributes to the*  
634 *epithelial-to-mesenchymal transition of cancer cells*. J Pathol, 2017. **242**(2): p. 221-233.
- 635 33. Druzhkova, I., et al., *E-Cadherin in Colorectal Cancer: Relation to Chemosensitivity*. Clin Colorectal  
636 Cancer, 2019. **18**(1): p. e74-e86.
- 637 34. Brodaczevska, K.K., et al., *Metastatic renal cell carcinoma cells growing in 3D on polyDlysine or*  
638 *laminin present a stemlike phenotype and drug resistance*. Oncol Rep, 2019. **42**(5): p. 1878-1892.
- 639 35. Dang, H.X., et al., *Long non-coding RNA LCAL62 / LINC00261 is associated with lung*  
640 *adenocarcinoma prognosis*. Heliyon, 2020. **6**(3): p. e03521.
- 641 36. Guinney, J., et al., *The consensus molecular subtypes of colorectal cancer*. Nat Med, 2015. **21**(11): p.  
642 1350-6.
- 643 37. Sveen, A., et al., *Colorectal Cancer Consensus Molecular Subtypes Translated to Preclinical Models*  
644 *Uncover Potentially Targetable Cancer Cell Dependencies*. Clin Cancer Res, 2018. **24**(4): p. 794-806.
- 645 38. Lavin, D.P. and V.K. Tiwari, *Unresolved Complexity in the Gene Regulatory Network Underlying EMT*.  
646 Front Oncol, 2020. **10**: p. 554.
- 647 39. Cheng, M., et al., *FLNA promotes chemoresistance of colorectal cancer through inducing epithelial-*  
648 *mesenchymal transition and smad2 signaling pathway*. Am J Cancer Res, 2020. **10**(2): p. 403-423.
- 649 40. Takahashi, Y., et al., *Tumor-derived tenascin-C promotes the epithelial-mesenchymal transition in*  
650 *colorectal cancer cells*. Anticancer Res, 2013. **33**(5): p. 1927-34.
- 651 41. Li, J., et al., *The clinical significance of circulating GPC1 positive exosomes and its regulative miRNAs*  
652 *in colon cancer patients*. Oncotarget, 2017. **8**(60): p. 101189-101202.
- 653 42. Huang, X., et al., *Snail/FOXK1/Cyr61 Signaling Axis Regulates the Epithelial-Mesenchymal Transition*  
654 *and Metastasis in Colorectal Cancer*. Cell Physiol Biochem, 2018. **47**(2): p. 590-603.
- 655 43. Jeong, D., et al., *Cyr61 expression is associated with prognosis in patients with colorectal cancer*.  
656 BMC Cancer, 2014. **14**: p. 164.
- 657 44. Bie, Y., et al., *The Crucial Role of CXCL8 and Its Receptors in Colorectal Liver Metastasis*. Dis Markers,  
658 2019. **2019**: p. 8023460.
- 659 45. Long, X., et al., *IL-8, a novel messenger to cross-link inflammation and tumor EMT via autocrine and*  
660 *paracrine pathways (Review)*. Int J Oncol, 2016. **48**(1): p. 5-12.
- 661 46. Yang, J.D., L. Ma, and Z. Zhu, *SERPINE1 as a cancer-promoting gene in gastric adenocarcinoma:*  
662 *facilitates tumour cell proliferation, migration, and invasion by regulating EMT*. J Chemother, 2019.  
663 **31**(7-8): p. 408-418.
- 664 47. McCorry, A.M., et al., *Epithelial-to-mesenchymal transition signature assessment in colorectal*  
665 *cancer quantifies tumour stromal content rather than true transition*. J Pathol, 2018. **246**(4): p. 422-  
666 426.
- 667 48. Vona, R., E. Iessi, and P. Matarrese, *Role of Cholesterol and Lipid Rafts in Cancer Signaling: A*  
668 *Promising Therapeutic Opportunity?* Front Cell Dev Biol, 2021. **9**: p. 622908.

- 669 49. Beck, B. and C. Blanpain, *Unravelling cancer stem cell potential*. Nat Rev Cancer, 2013. **13**(10): p.  
670 727-38.
- 671 50. Krens, L.L., et al., *Statin use is not associated with improved progression free survival in cetuximab*  
672 *treated KRAS mutant metastatic colorectal cancer patients: results from the CAIRO2 study*. PLoS  
673 One, 2014. **9**(11): p. e112201.
- 674 51. Shao, Y.Y., et al., *Statin Use Is Associated With Improved Prognosis of Colorectal Cancer in Taiwan*.  
675 Clin Colorectal Cancer, 2015. **14**(3): p. 177-184 e4.
- 676 52. Yang, Z., et al., *Cholesterol inhibits hepatocellular carcinoma invasion and metastasis by promoting*  
677 *CD44 localization in lipid rafts*. Cancer Lett, 2018. **429**: p. 66-77.
- 678 53. Babina, I.S., et al., *A novel mechanism of regulating breast cancer cell migration via palmitoylation-*  
679 *dependent alterations in the lipid raft affiliation of CD44*. Breast Cancer Res, 2014. **16**(1): p. R19.
- 680 54. Donatello, S., et al., *Lipid raft association restricts CD44-ezrin interaction and promotion of breast*  
681 *cancer cell migration*. Am J Pathol, 2012. **181**(6): p. 2172-87.
- 682 55. Murai, T., *The role of lipid rafts in cancer cell adhesion and migration*. Int J Cell Biol, 2012. **2012**: p.  
683 763283.
- 684 56. Murai, T., et al., *Low cholesterol triggers membrane microdomain-dependent CD44 shedding and*  
685 *suppresses tumor cell migration*. J Biol Chem, 2011. **286**(3): p. 1999-2007.
- 686 57. Aiello, N.M., et al., *EMT Subtype Influences Epithelial Plasticity and Mode of Cell Migration*. Dev  
687 Cell, 2018. **45**(6): p. 681-695 e4.
- 688 58. Comaills, V., et al., *Genomic Instability Is Induced by Persistent Proliferation of Cells Undergoing*  
689 *Epithelial-to-Mesenchymal Transition*. Cell Rep, 2016. **17**(10): p. 2632-2647.

690

## 691 **Acknowledgements**

692 This work has been supported by Inserm/Institut Paoli-Calmettes and grants from the AP-  
693 HM AORC Junior 2018, Canceropole PACA 2018, GIRCI Mediterranée 2019. A.A. is  
694 supported by a postdoctoral fellowship from the "Fondation ARC" (n°PDF20180507565)  
695 and the "Fondation de France" (n°00107936). We want to thanks C. Lachaud for sharing  
696 the chemidoc equipment.

697

698

699 **Figure legends**

700

701 **Figure 1: Characterization and validation of the EMT induced model**

702 Cells were grown in 3D in ULA plate for 2 days (Day-2). At day 0, the EMT and EMT-MET  
703 samples were treated with the EMT-inducing cocktail for 5 days. For EMT-MET samples,  
704 the spheroids were washed off the EMT-inducing cocktail and grown for 4 more days in  
705 normal medium. **A)** Experimental setting. **B)** Representative photos of the spheroids for  
706 the baseline, EMT, EMT-MET conditions, at days 0, 3, 5, 7 and 9. **C)** Western Blots of  
707 proteins involved in EMT: FIBRONECTIN, ZEB1, VIMENTIN, OCCLUDIN. ACTIN was  
708 used as loading control. **D)** Hierarchical clustering of triplicate samples of three conditions  
709 i.e. baseline, EMT and EMT-MET and 3,131 genes based on mRNA expression levels with  
710 standard deviation (SD)>0.25. Each row represents a gene and each column represents a  
711 sample. Robust clusters defined by pvclust with an approximately unbiased p-value>100%  
712 and identified with (an asterisk and) the associated Pearson correlation. **E)** The  
713 Consensus Molecular Subtype (CMS) classification was applied to mRNA expression  
714 profile of each sample by using the CMScaller tool from Eide et al. [21], providing a score  
715 for the four CMS subtypes (CMS1, CMS2, CMS3, and CMS4). Box plot comparing the four  
716 CMS scores according each condition (baseline, EMT or EMT-MET). The significant  
717 differences defined by one-way ANOVA post hoc Tukey test are visualized with an arrow  
718 and p-value are indicated as follows. \* :  $p < 0.05$ , \*\*:  $p < 0.01$

719

720 **Figure 2. Epithelial to Mesenchymal transition pathways, Cholesterol homeostasis**  
721 **and bile acid metabolism are inversely regulated by the addition and the release of**  
722 **the EMT-inducing cocktail**

723 **A)** Sixteen gene-sets out from the MSigDB Molecular Signatures Database (GSEA) were  
724 differentially regulated in at least one comparison ( $q$ -value<1%): Baseline vs EMT or EMT

725 vs EMT-MET. The 3 gene sets inversely regulated in the two conditions were “*Epithelial*  
726 *Mesenchymal Transition*”; “*Bile Acid Metabolism*”; “*Cholesterol Homeostasis*” (white  
727 background). **B)** Heatmap of metagenes in the nine samples ordered by condition i.e.  
728 Baseline, MT and EMT-MET conditions. Metagene of the three gene sets that were  
729 significantly and oppositely deregulated in both comparisons were built using the core  
730 genes defined in GSEA analysis: “*Epithelial Mesenchymal Transition*” (14 genes); “*Bile*  
731 *Acid Metabolism*” (17 genes); “*Cholesterol Homeostasis*” (21 genes). **C)** Box plot  
732 comparing the three individual metagenes according each condition (baseline, EMT or  
733 EMT-MET). P-values (ANOVA post hoc Tukey test) are indicated as follows \*\*\*  $p < 0.001$ .

734

735

736 **Figure 3: Epithelial to Mesenchymal transition pathways and Cholesterol**  
737 **homeostasis have synergic prognostic value in patients.**

738 Patients were classified as positive or negative according to their metagenes scores. **A)**  
739 Kaplan-Meier curves for recurrence free survival (RFS) of 1887 CRC patients assessed  
740 using the log-rank test, for the 3 metagenes: “*Epithelial Mesenchymal Transition*”, “*Bile*  
741 *Acid Metabolism*” and “*Cholesterol Homeostasis*”. **B)** Forest plot showing the hazard ratio  
742 for survival events of each GSEA metagene and recurrence-free survival in CRC patients  
743 in univariate and multivariate analysis. A ratio greater than one indicates a poor prognosis  
744 and a ratio lower than one indicates good prognosis. The black squares correspond to  
745 significant genes and the grey ones to non-significant and the lines defined the 95%  
746 confidence interval. **C)** Kaplan-Meier curves for RFS according to four groups: *Epithelio-*  
747 *Mesenchymal transition*”-negative/“*Cholesterol Homeostasis*”-positive” group (green,  
748  $n=452$ ), “*Epithelio-Mesenchymal transition*”-negative/“*Cholesterol Homeostasis*”-negative  
749 group (black,  $n=445$ ), “*Epithelio-Mesenchymal transition*”-positive/“*Cholesterol*  
750 *Homeostasis*”-positive group (blue,  $n=481$ ), and “*Epithelio-Mesenchymal transition*”-

751 positive/“*Cholesterol Homeostasis*”-negative group (red, n=459). **D)** Kaplan-Meier curves  
752 for survival model derived from the fusion of and *Cholesterol Homeostasis* metagenes  
753 (“*Epithelial Mesenchymal Transition*” and “*Cholesterol Homeostasis*”).) in the training  
754 (n=450) and the validation (n=1387) sets.

755

756 **Figure 4: Morphological changes induced with statins depending on the EMT-MET**  
757 **status**

758 For these experiments, cells were grown in ULA plate for 2 days (Day-2) as dense  
759 spheroids. Two setting were then used. **A-C)** First setting: From day 0 to day 5, spheroids  
760 were either cultured with regular media (baseline), or co-treated with the EMT-inducing  
761 cocktail plus DMSO or the EMT-inducing cocktail plus simvastatin. **A)** Experimental  
762 setting. **B)** Representative photos of the spheroids in baseline, DMSO and Simvastatin  
763 conditions. **C)** Quantification of the spheroid size in arbitrary unit (no significant statistical  
764 differences).

765 **D-F)** Second setting: From day 0 to day 5, spheroids were treated with the EMT-inducing  
766 cocktail. Then, the EMT-inducing cocktail was washed out and replaced with medium,  
767 DMSO (0.5 %), Ethanol (0.5 %), Simvastatin (50  $\mu$ M), or Lovastatin (50  $\mu$ M) for 5 days. **D)**  
768 Experimental setting. **E)** Representative photos of the spheroids for each condition. **F)**  
769 Quantification of the spheroid size, in arbitrary unit. Mean values (+/- SEM) are  
770 represented as histograms.

771

772 **Figure 5: Graphical summary of the potential relationship between EMT activation**  
773 **and the cholesterol pathway.**

774 The mevalonate pathway leads to cholesterol synthesis. Cholesterol is involved in multiple  
775 biological homeostatic mechanisms (Bile acid, steroid hormones and vitamin D precursor,  
776 Membrane stability and rigidity, Lipid raft organization ...). Cholesterol inhibits the

777 synthesis of SREBP1, a transcription factor for the TGF $\beta$ 1 signaling. TGF $\beta$ 1 signaling is a  
778 key feature of the CMS4 mesenchymal class. Our data suggest that low cholesterol in a  
779 pro-EMT environment might favor the differentiation of CMS4 mesenchymal tumors, while  
780 high cholesterol favored more epithelial tumors. Genes down regulated in our Cholesterol  
781 Homeostasis metagene are written in red. Statins are inhibitors of the HMGCR enzyme.  
782  
783

784

785 **Supplementary Figure 1: Cholesterol homeostasis regulator HMGCR and DHCR7 are**  
786 **down regulated by the EMT-inducing cocktail treatment.**

787 Cells were grown in 3D in ULA plate for 2 days (Day-2). At day 0, the EMT and EMT-MET  
788 samples were treated with the EMT-inducing cocktail for 5 days. For EMT-MET samples,  
789 the spheroids were washed off the EMT-inducing cocktail and grown for 4 more days in  
790 normal medium. Cells are collected and lysed with RIPA buffer before to be subjected to a  
791 Western Blot analysis. FIBRONECTINE (FIBRO.) is a mesenchymal marker,  
792 CYTOKERATINES (pan CTK) are mostly epithelial markers, both to verify EMT induction  
793 by the EMT-inducing cocktail. DHCR7 and HMGCR are regulators of the cholesterol  
794 homeostasis pathway. Actin is the loading control.

795

796

797

798

799

800

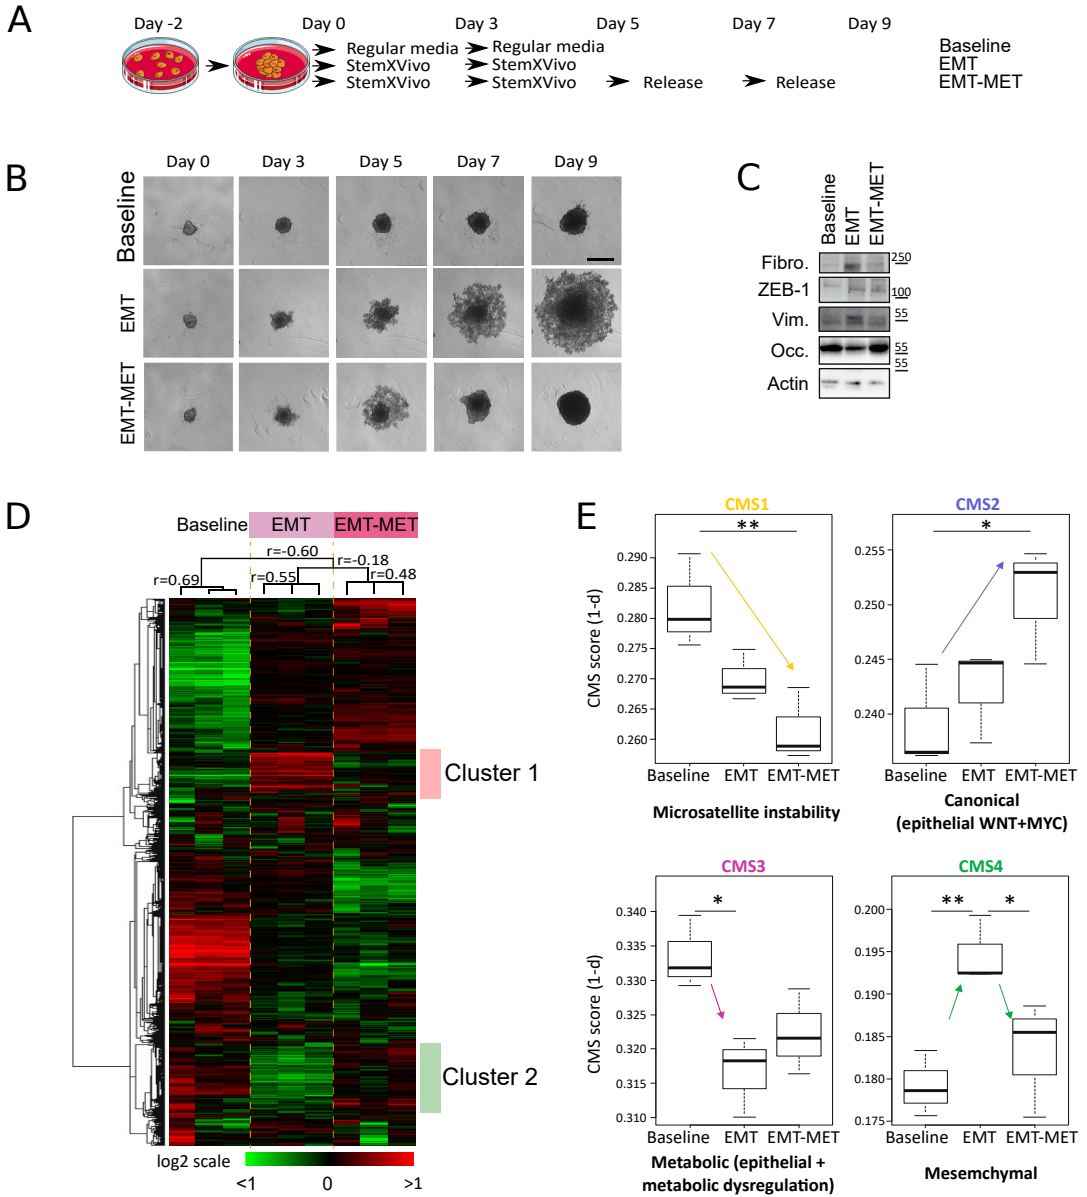

Figure 1



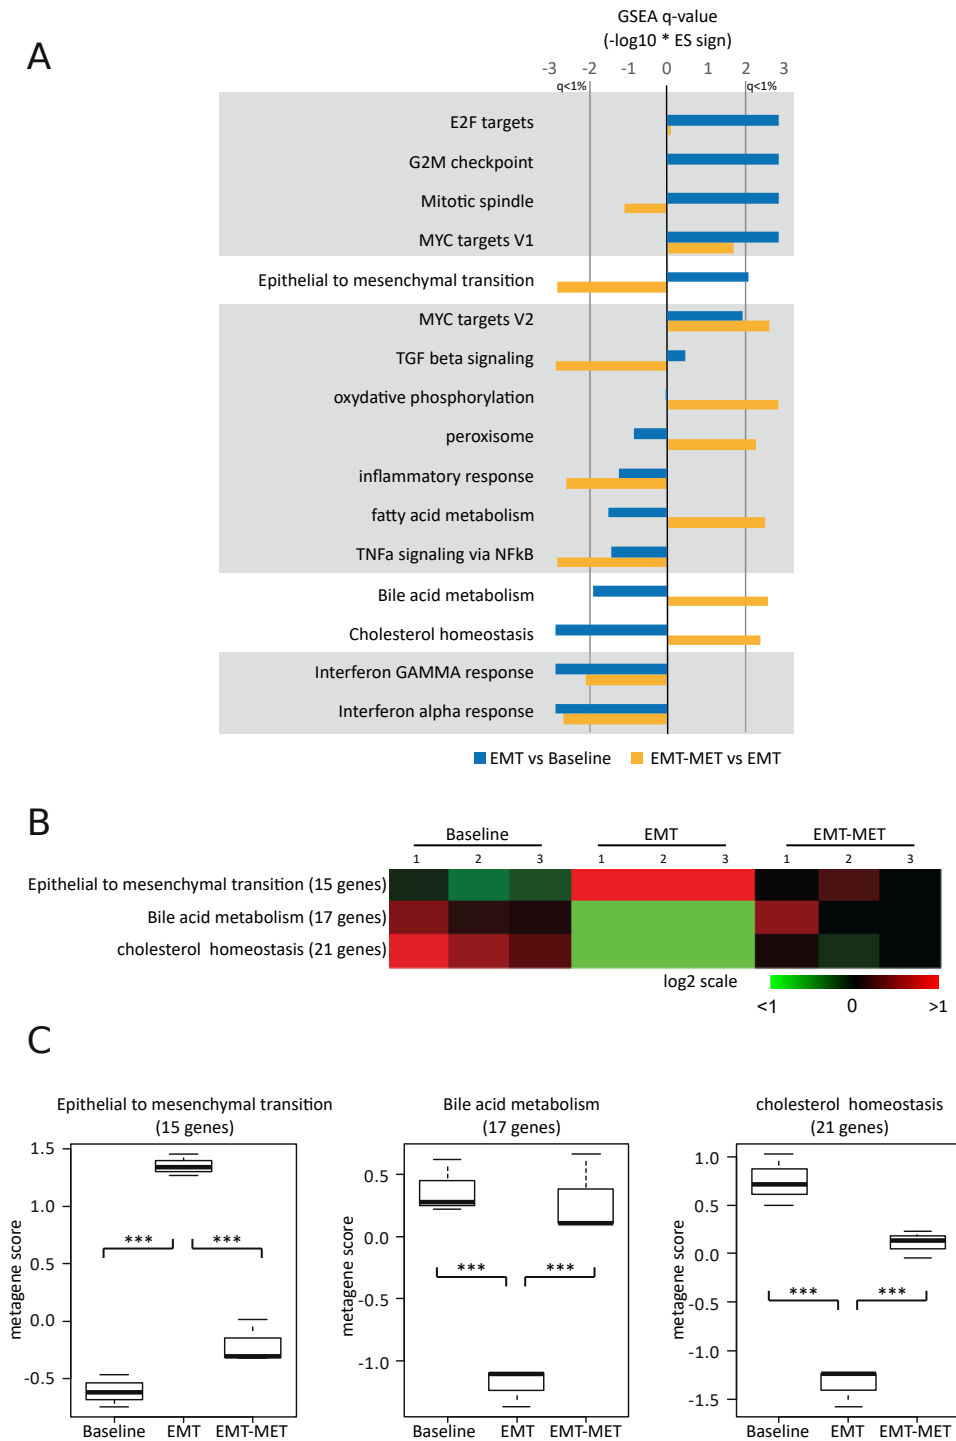

Figure 2

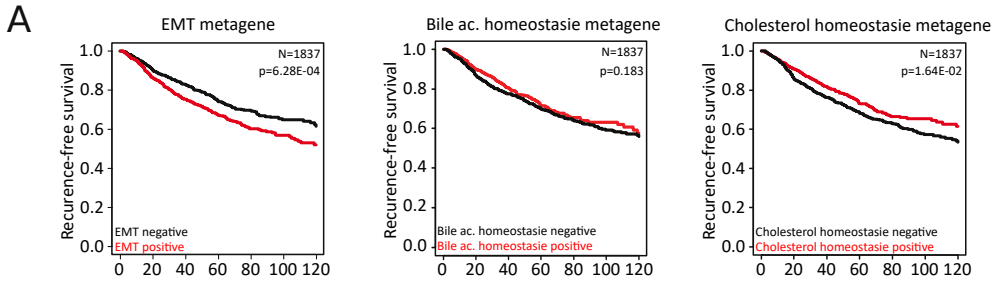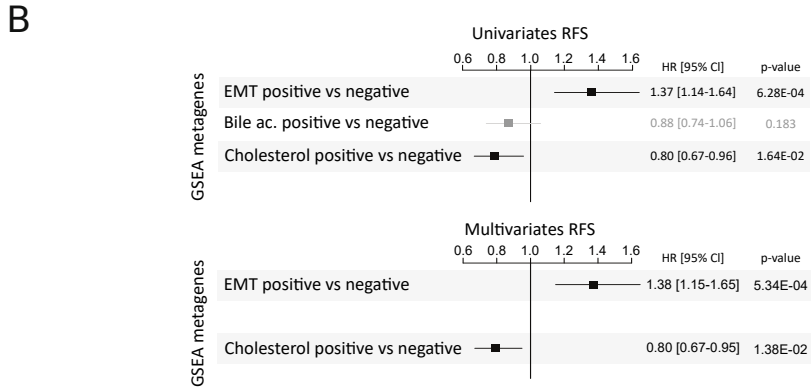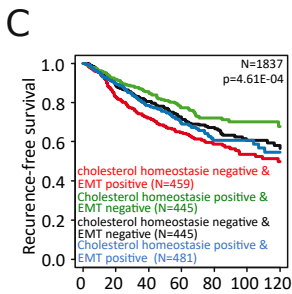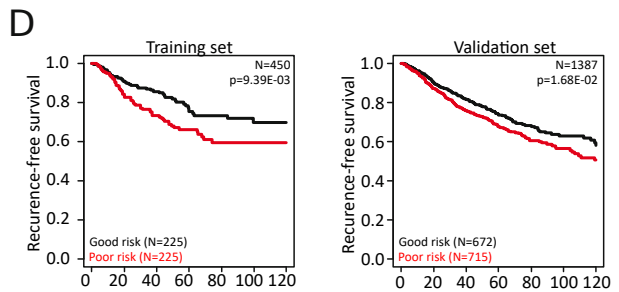

Figure 3

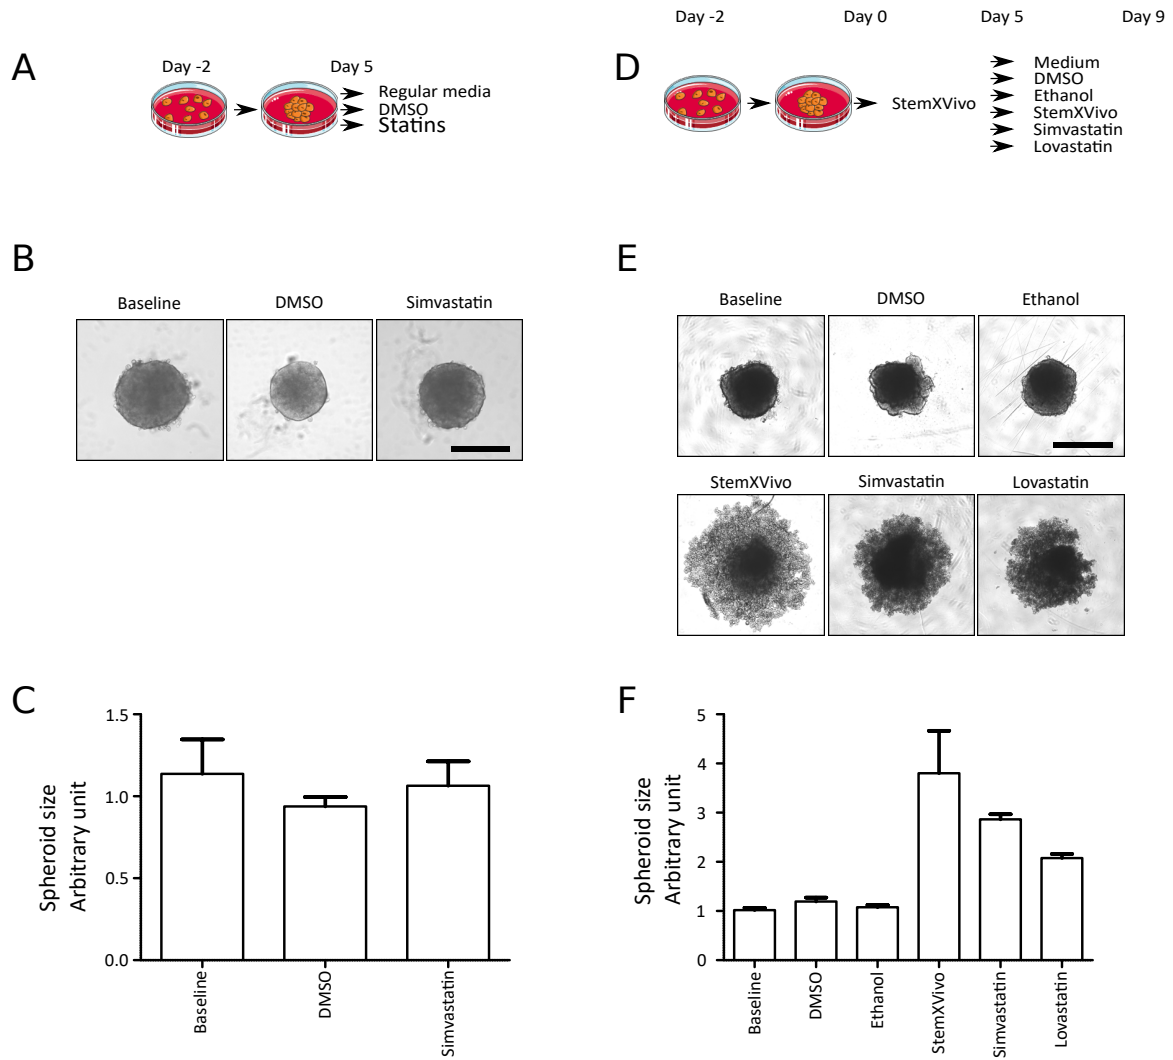

Figure 4

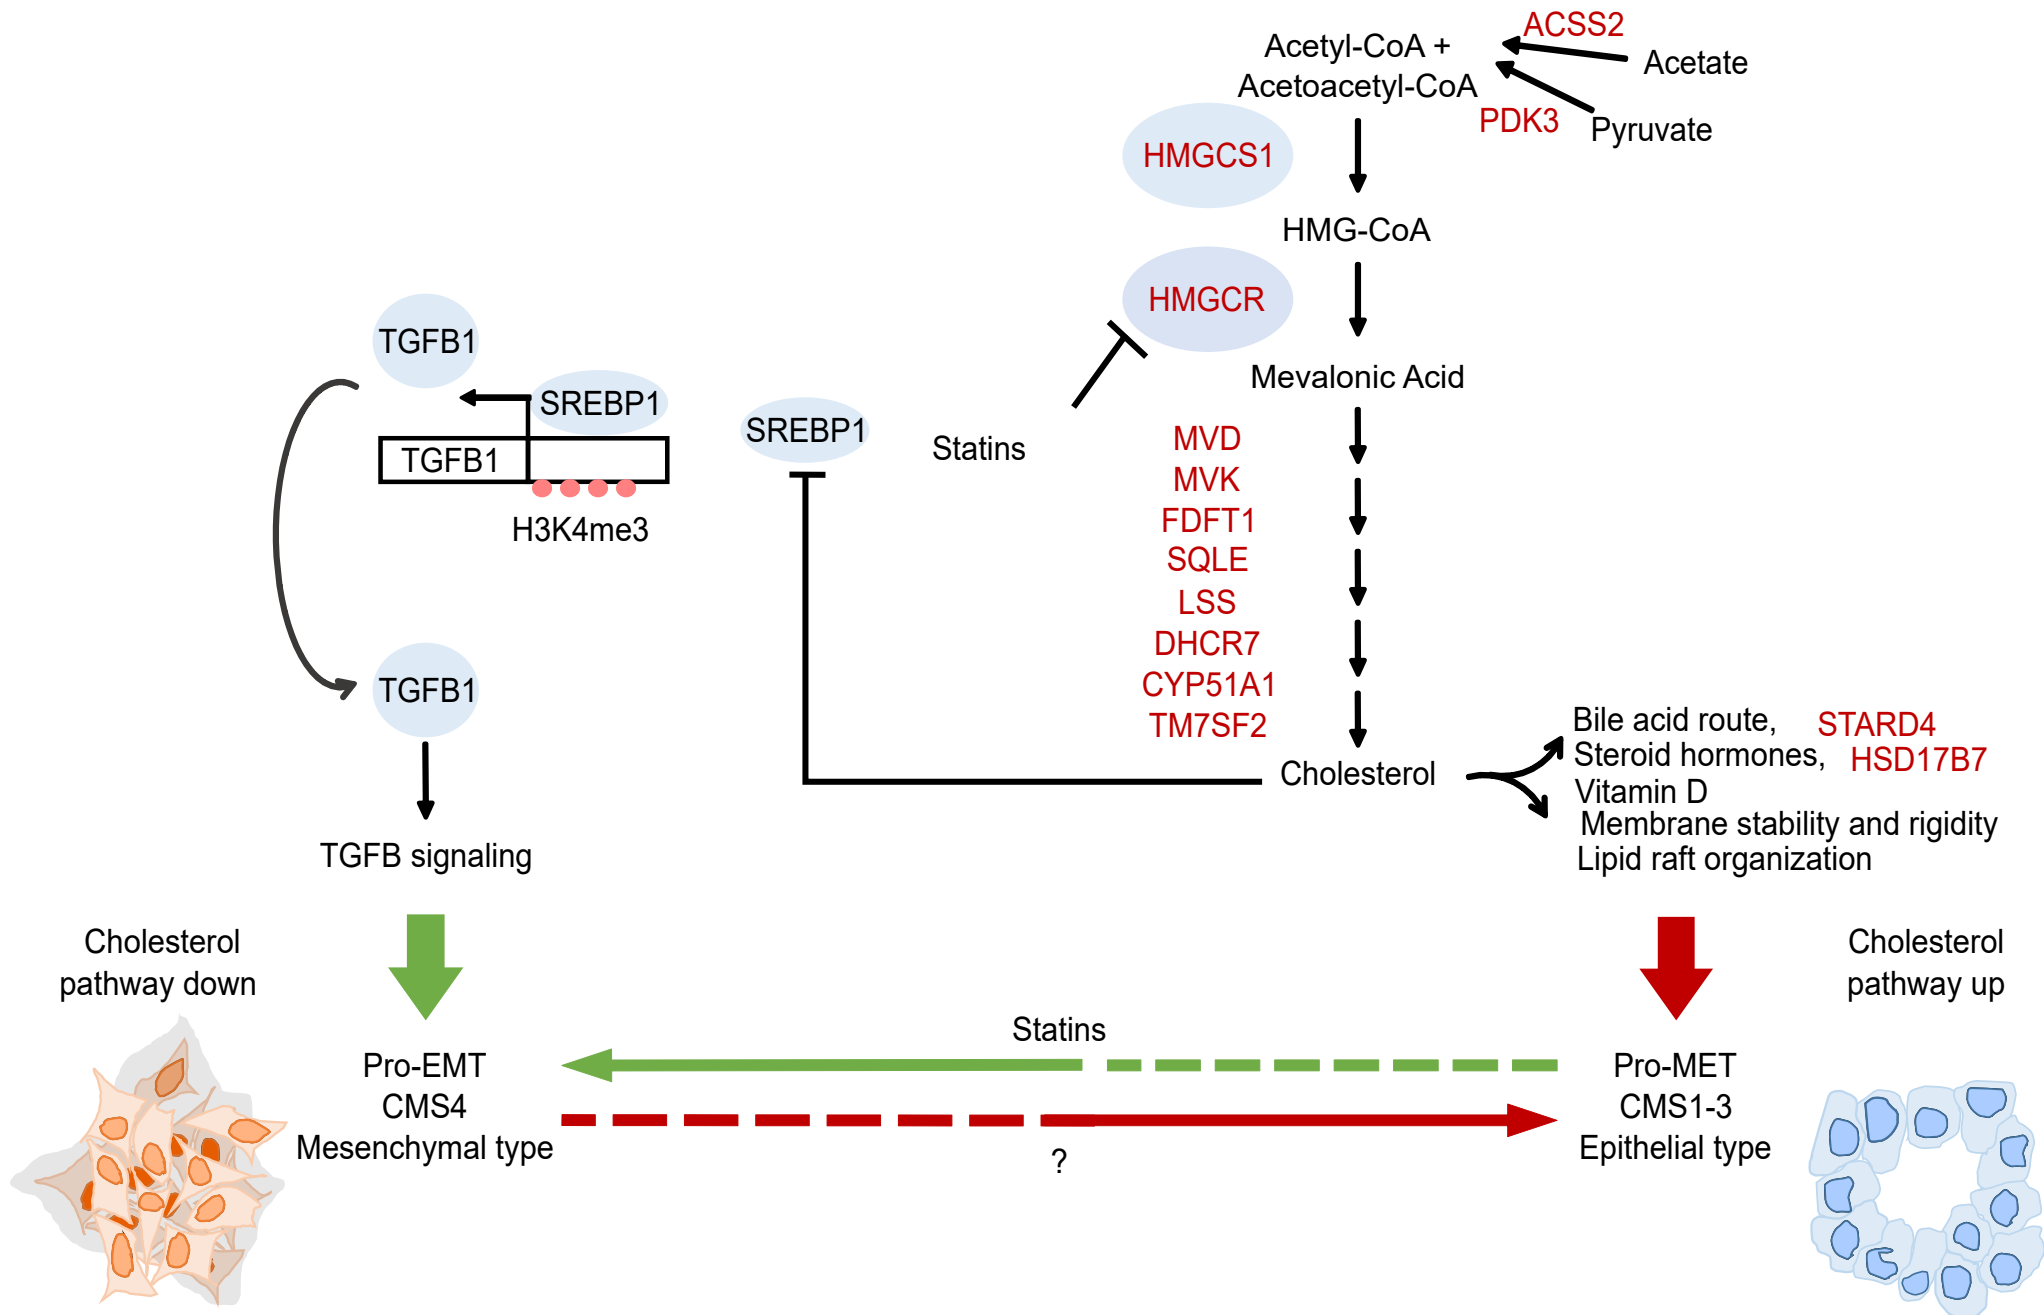

Figure 5

**Table 1:**  
Clinicopathological characteristics of the 2,239 primary colon cancer samples

| <b>Characteristics</b>           |          | <b>N (%)</b> |
|----------------------------------|----------|--------------|
| Age_Diag50                       | <=50     | 228 (12%)    |
|                                  | >50      | 1702 (88%)   |
| Sex                              | female   | 954 (47%)    |
|                                  | male     | 1069 (53%)   |
| Location                         | distal   | 840 (50%)    |
|                                  | proximal | 854 (50%)    |
| pStage                           | 1        | 167 (10%)    |
|                                  | 2        | 667 (41%)    |
|                                  | 3        | 548 (34%)    |
|                                  | 4        | 237 (15%)    |
| Grade                            | 1        | 26 (6%)      |
|                                  | 2        | 353 (77%)    |
|                                  | 3        | 77 (17%)     |
| CMS                              | CMS1     | 389 (20%)    |
|                                  | CMS2     | 640 (32%)    |
|                                  | CMS3     | 343 (17%)    |
|                                  | CMS4     | 604 (31%)    |
| Follow-up median, months (range) |          | 43 (1-212)   |
| 5y-RFS                           |          | 71% [68-73]  |

**Table 2:**  
Correlations of the "EMT-CHL model"-based classes with clinicopathological variables

| <b>EMT' + 'CHL hom.' Cox model<br/>(Validation set)</b> |          |                 |                  |                 |
|---------------------------------------------------------|----------|-----------------|------------------|-----------------|
| <b>Characteristic</b>                                   | <b>N</b> | <b>low-risk</b> | <b>high-risk</b> | <b>p-value</b>  |
| Age_Diag50                                              |          |                 |                  | 0.0507          |
| <=50                                                    | 139      | 25 (8%)         | 114 (13%)        |                 |
| >50                                                     | 1064     | 277 (92%)       | 787 (87%)        |                 |
| Sex                                                     |          |                 |                  | <b>0.00201</b>  |
| female                                                  | 603      | 127 (40%)       | 476 (50%)        |                 |
| male                                                    | 668      | 192 (60%)       | 476 (50%)        |                 |
| Location_2K                                             |          |                 |                  | 0.921           |
| distal                                                  | 517      | 130 (48%)       | 387 (49%)        |                 |
| proximal                                                | 543      | 139 (52%)       | 404 (51%)        |                 |
| pStage                                                  |          |                 |                  | <b>3.00E-04</b> |
| 1                                                       | 123      | 34 (15%)        | 89 (12%)         |                 |
| 2                                                       | 466      | 130 (56%)       | 336 (44%)        |                 |
| 3                                                       | 399      | 67 (29%)        | 332 (44%)        |                 |
| 4                                                       | 0        | 0 (0%)          | 0 (0%)           |                 |
| Grade                                                   |          |                 |                  | 0.876           |
| 1                                                       | 19       | 5 (7%)          | 14 (6%)          |                 |
| 2                                                       | 259      | 59 (78%)        | 200 (80%)        |                 |
| 3                                                       | 47       | 12 (16%)        | 35 (14%)         |                 |
| CMS                                                     |          |                 |                  | <b>3.50E-33</b> |
| CMS1                                                    | 269      | 52 (19%)        | 217 (23%)        |                 |
| CMS2                                                    | 401      | 138 (51%)       | 263 (28%)        |                 |
| CMS3                                                    | 212      | 79 (29%)        | 133 (14%)        |                 |
| CMS4                                                    | 343      | 3 (1%)          | 340 (36%)        |                 |
| Follow-up median, months (range)                        | 1387     | 42 (1-192)      | 42 (1-203)       | 0.387           |
| 5y-RFS                                                  | 1387     | 74% [70-78]     | 68% [64-72]      | 1.68E-02        |

**Table 3:**  
Uni- and multivariate analyses for RFS in the validation set

| RFS           |                     | Univariate |                   |                 | Multivariate |                   |                 |
|---------------|---------------------|------------|-------------------|-----------------|--------------|-------------------|-----------------|
|               |                     | N          | HR [95%CI]        | p-value         | N            | HR [95%CI]        | p-value         |
| Age_Diag50    | >50 vs. <=50        | 1203       | 0.98 [0.70-1.37]  | 0.894           |              |                   |                 |
| Sex           | male vs. female     | 1271       | 1.09 [0.87-1.35]  | 0.458           |              |                   |                 |
| Location      | proximal vs. distal | 1060       | 1.00 [0.79-1.26]  | 0.998           |              |                   |                 |
| pStage        | 2 vs. 1             | 988        | 3.48 [1.41- 8.62] | <b>3.09E-10</b> | 861          | 2.53 [1.01-6.33]  | <b>4.78E-02</b> |
|               | 3 vs. 1             |            | 7.74 [3.16-18.93] |                 | 861          | 5.77 [2.35-14.20] | <b>1.36E-04</b> |
|               | 4 vs. 1             |            | NA [ NA- NA]      |                 | 861          | <NA> [ NA-NA]     | <NA>            |
| Grade         | 2 vs. 1             | 325        | 1.24 [0.39-3.97]  | 0.569           |              |                   |                 |
|               | 3 vs. 1             |            | 1.70 [0.47-6.12]  |                 |              |                   |                 |
| CMS           | CMS2 vs. CMS1       | 1225       | 0.75 [0.54-1.03]  | <b>2.29E-03</b> | 861          | 0.69 [0.43-1.10]  | 0.121           |
|               | CMS3 vs. CMS1       |            | 0.91 [0.64-1.30]  |                 | 861          | 1.13 [0.68-1.90]  | 0.636           |
|               | CMS4 vs. CMS1       |            | 1.28 [0.94-1.73]  |                 | 861          | 1.31 [0.87-1.97]  | 0.196           |
| EMT-CHL model | high- vs. low-risk  | 1387       | 1.35 [1.04-1.75]  | <b>2.51E-02</b> | 861          | 1.7 [1.02-2.83]   | <b>4.02E-02</b> |

**Table 4:**

Top 15 drug classes identified with connectivity map (L1000), 14 EMT vs. 21g CHL GSEA core genes

| Drug class (moa)                | Number of significant pertubagen signatures | Normalised connectivity score (ncs): average ncs | ncs average 95% CI   | reproducibility of ncs per drug class (t-test) |                 |                |
|---------------------------------|---------------------------------------------|--------------------------------------------------|----------------------|------------------------------------------------|-----------------|----------------|
|                                 |                                             |                                                  |                      | t                                              | p.value         | score          |
| Dopamine receptor antagonist    | 93                                          | -1.64                                            | [-1.67,-1.61]        | -98.47                                         | 4.83E-95        | -94.316        |
| EGFR inhibitor                  | 80                                          | -1.65                                            | [-1.74,-1.55]        | -33.31                                         | 2.86E-48        | -47.544        |
| Serotonin receptor antagonist   | 44                                          | -1.63                                            | [-1.68,-1.58]        | -62.43                                         | 7.92E-44        | -43.101        |
| PDGFR inhibitor                 | 37                                          | -1.65                                            | [-1.71,-1.59]        | -57.98                                         | 3.75E-37        | -36.426        |
| Bcr-Abl inhibitor               | 33                                          | -1.67                                            | [-1.72,-1.62]        | -63.64                                         | 2.85E-35        | -34.545        |
| Abl inhibitor                   | 33                                          | -1.67                                            | [-1.72,-1.62]        | -63.64                                         | 2.85E-35        | -34.545        |
| Histamine receptor antagonist   | 33                                          | -1.61                                            | [-1.66,-1.56]        | -62.66                                         | 4.67E-35        | -34.331        |
| KIT inhibitor                   | 34                                          | -1.66                                            | [-1.72,-1.6]         | -56.25                                         | 2.34E-34        | -33.631        |
| Adrenergic receptor antagonist  | 30                                          | -1.61                                            | [-1.66,-1.55]        | -58.08                                         | 1.46E-31        | -30.836        |
| <b>HMGCR inhibitor / statin</b> | <b>31</b>                                   | <b>-1.67</b>                                     | <b>[-1.74,-1.61]</b> | <b>-53.31</b>                                  | <b>2.79E-31</b> | <b>-30.554</b> |
| Src inhibitor                   | 30                                          | -1.71                                            | [-1.77,-1.64]        | -55.4                                          | 5.65E-31        | -30.248        |
| Calcium channel blocker         | 24                                          | -1.66                                            | [-1.72,-1.61]        | -61.46                                         | 5.13E-27        | -26.29         |
| Tricyclic antidepressant        | 26                                          | -1.7                                             | [-1.77,-1.63]        | -48.88                                         | 2.45E-26        | -25.611        |
| Estrogen receptor antagonist    | 25                                          | -1.68                                            | [-1.75,-1.62]        | -52.34                                         | 2.99E-26        | -25.524        |
| VEGFR inhibitor                 | 50                                          | -1.63                                            | [-1.78,-1.47]        | -21.1                                          | 3.04E-26        | -25.517        |
