1 **TITLE**

2 **Epithelial-to-mesenchymal transition lowers the cholesterol pathway, which**  
3 **influences colon tumors differentiation.**

4

5 **RUNNING TITLE**

6 **Epithelial-to-mesenchymal transition regulates the cholesterol pathway and colon**  
7 **cancer differentiation**

8

9

10 **AUTHORS' LIST**

11 Anaïs Aulas<sup>1\*</sup>, Maria Lucia Liberatoscioli<sup>1\*</sup>, Pascal Finetti<sup>1</sup>, Olivier Cabaud<sup>1</sup>, David J.  
12 Birnbaum<sup>1,2</sup>, Daniel Birnbaum<sup>1#</sup>, François Bertucci<sup>1,3#</sup> & Emilie Mamessier<sup>1#</sup>

13

14 **AUTHORS' CONTRIBUTION and notes**

15 AA, FB, DB and EM designed the study. AA, MLL, and OC performed experiments. PF,  
16 MLL and FB did the biocomputational analyses. DJB provided samples and clinical  
17 rationale. FB, DJB, DB proofread the manuscript. AA, MLL and EM designed the figures  
18 and wrote the manuscript. co-authorship: \* AA and ML are co-first authors. # DB, FB  
19 and EM are co-last authors.

20

21 **AFFILIATION**

22 <sup>1</sup> Predictive Oncology Laboratory, Cancer Research Center of Marseille (CRCM),  
23 Inserm U1068, CNRS UMR7258, Institut Paoli-Calmettes, Aix Marseille Université,  
24 Marseille, France.

25 <sup>2</sup> Department of Digestive Surgery, Hospital Nord, Aix-Marseille University, Chemin des  
26 Bourrely, 13015, Marseille, France.

27 <sup>3</sup> Oncology Medical unit, Institut Paoli-Calmettes, Aix-Marseille University, Marseille,  
28 France.

29

30 **CORRESPONDING AUTHOR**

31 [emilie.mamessier@inserm.fr](mailto:emilie.mamessier@inserm.fr)

32

33 **KEY WORDS**

34 Epithelial to mesenchymal transition, EMT, mesenchymal to epithelial transition, MET,  
35 colorectal cancer, metastasis, prognosis, cholesterol, survival

36

37

38 **TRANSLATIONAL RELEVANCE (120-150 WORD)**

39 Metastases are the main cause of death of colorectal cancer (CRC) and the  
40 major issue in CRC management. Understanding the chain of events that lead to  
41 metastasis occurrence is urgent to identify new biomarkers of progression and/or new  
42 potential targets. Epithelial to mesenchymal transition (EMT) is a major player in cancer  
43 dissemination that remains non-targetable due to its broad involvement in tissue  
44 homeostasis. Here, we used a relevant *in vitro* dynamic model to identify the pathways  
45 triggered during EMT in CRC and how this might improve tumors classification,  
46 prognosis and open therapeutic avenue for this deadly disease. The cholesterol  
47 pathway surprisingly popped-out from this model and turned out to be a good prognosis  
48 factor of disease-free survival for CRC. Altogether, our results showed that an active  
49 EMT program lowers the cholesterol pathway, which further influence the differentiation  
50 of colon tumor toward the most aggressive subtypes.

51

52

53 **ABSTRACT 185 words (current 184)**

54 Colorectal cancer (CRC) is the second cause of death worldwide. Up to 70% of  
55 CRC patients will metastasize. Identify new biomarkers of progression to prevent/delay  
56 disease evolution is urgent. Epithelial-to-mesenchymal transition (EMT) is a major  
57 program engaged during metastasis. We aim at identifying a combination of new genes  
58 that further identify signs of EMT in cancer tissues. We treated HT-29 cells grown in 3D  
59 with an EMT Inducing cocktail, and collect them before during and after treatment. For  
60 each condition, pan-transcriptomic analyses were done. Genes that were both induced  
61 upon EMT induction and inhibited upon EMT release (mesenchymal-to-epithelial  
62 transition or MET) were selected. We identified new genes for EMT-MET programs.  
63 These genes were used to build a metagene that, when applied to a database of  
64 transcriptomic data from primary colorectal tumors (n= 2,239), had an independent  
65 prognosis value. Finally, we submitted this metagene to CMap and identified drugs that  
66 might affect EMT-MET programs. Statins, well-known inhibitors of cholesterol synthesis,  
67 were among them and effectively delayed MET. These data show that cholesterol and  
68 EMT pathways are opposite regulators and impact differently tumor differentiation and  
69 outcome.

## 70 **INTRODUCTION**

71 Colorectal cancer (CRC) is the third most common cancer and the second cause  
72 of death worldwide (International Agency for Research on Cancer, WHO;  
73 <http://gco.iarc.fr/today/fact-sheets-cancers>). However, the actual therapeutic  
74 management proposed to CRC patients is not sufficient. For now, it consists in the  
75 surgical removal of the primary tumor, followed by adjuvant chemotherapy in high-risk  
76 cases. Metastases are the main cause of death of CRC patients, and thus the major  
77 issue in CRC management. Up to 70% of CRC patients will relapse or metastasize  
78 within 5 years following surgery of the primary tumor. The 5-year overall survival for  
79 metastatic patients is 14% against 90% for non-metastatic patients [1].

80 Cells prone to metastasis undergo an epithelial-to-mesenchymal transition  
81 (EMT), a biological process by which cells are re-programmed, lose their cell-to-cell  
82 contacts, polarity and ultimately reshape their cytoskeleton to escape from the initial  
83 tumor site [2]. Many works have searched for the initial events that trigger EMT in  
84 cancer cells, based on the assumption that targeting EMT inducers might limit  
85 metastasis [3, 4]. TGF $\beta$ , which is a prominent growth factor at primary tumor sites [5, 6],  
86 turned up to be a key inducer of the EMT program [7]. However, TGF $\beta$  inhibition was  
87 not successful because of the major involvement of this growth factor in many other  
88 physiological functions [5, 6]. Moreover, EMT can be triggered in many ways that go  
89 beyond the TGF $\beta$  pathway alone [8, 9]. We choose to use a combination of different  
90 factors known to be involved in the EMT process such as recombinant WNT5A [10, 11],  
91 TGF $\beta$  [12] and neutralizing antibodies against known inhibitors of EMT, such as SFRP1  
92 [13, 14], DKK1 [15] and CDH1 [16, 17]. The combination of these factors reproducibly  
93 induces an EMT phenotype in epithelial cancer cells cultivated *in vitro* within one week:  
94 cells detach from their neighbors, adopt spindle shapes and a migratory potential.  
95 Characteristic features of treated cells are a decreased expression of adhesion proteins

96 E-Cadherin and Occludin, whereas Fibronectin and Vimentin expression are enhanced  
97 [18-20].

98 The identification of genes specifically activated during the EMT program has  
99 been another goal, however difficult to achieve in complex samples such as human  
100 tumors. *In vitro* approaches have thus often been privileged. A major common caveat  
101 from these approaches was that the cells exposed to the different EMT inducing  
102 factors were usually grown flat [6, 15, 21-23]. We know now that signaling pathways of  
103 cells grown in 2D are different from those of tissues and that 3D cultures are more  
104 relevant [24, 25]. The extensive study from cells grown in 2D most certainly contributed  
105 to limit the identification of EMT regulatory factors to components forming the « tip of the  
106 iceberg », leaving hidden other potential actors. This limitation led us to study how EMT  
107 induction can promote pro-invasive features from colon cancer cells, with the aim of  
108 revealing novel EMT-related molecular vulnerabilities, potentially useful as new  
109 prognostic factors and/or novel targets.

110 For this, we used a 3D *in vitro* model and a timeline exposition to the EMT-  
111 inducing cocktail to study reversible genes involved in EMT and Mesenchymal-to-  
112 Epithelial Transition (MET) programs. From the genes identified, we build a metagene  
113 and tested its prognostic value in a large database of CRC samples, annotated with  
114 clinical data. Finally, still using these genes, we searched for FDA approved drugs that  
115 might influence the EMT-MET programs and found that statins alter the execution of the  
116 EMT program.

## 117 **MATERIAL& METHODS**

### 118 **Cell culture**

119 HT29 cells were obtained from the ATCC<sup>®</sup> Human Cell Lines (ATCC, Manassas, VA,  
120 USA) and cultured using Dulbecco Modified Eagle Medium (DMEM, GIBCO, Waltham,  
121 MA, USA) with 10% Fetal Calf Serum (FCS, Eurobio, Les Ulis, France) in 5% CO<sub>2</sub> at  
122 37°C. Classical 2D cell cultures were seeded in Falcon<sup>®</sup> 6-well, whereas spheroids  
123 culture were seeded in Cell Carrier Spheroid ULA 96-well Microplates<sup>™</sup> (PerkinElmer,  
124 Waltham, MA, USA). For EMT induction, cells were plated 2 days in regular media  
125 before to be supplemented with StemXVivo<sup>®</sup> EMT Inducing Media Supplement (R&D,  
126 Minneapolis, MN, USA) at 1X concentration for the indicated time. Cells were treated  
127 with lovastatin and simvastatin (Sellekchem, Houston, TX, USA) at indicated  
128 concentration and time.

129

### 130 **Western Blotting**

131 Cells were scraped and lysed in RIPA buffer (150 mM NaCl, 50 mM Tris, pH 7.4, 1%  
132 Triton X-100, 0.1% SDS, 1% sodium deoxycholate) supplemented with HALT protease  
133 inhibitor 1X (Thermo Fisher Scientific, Waltham, MA, USA), incubated for 10 min on ice,  
134 and centrifuged at 13800 g. Supernatants were collected and quantified with Bradford  
135 Protein Assay kit (Thermo Fisher Scientific, Waltham, MA, USA). NuPAGE<sup>®</sup> LDS  
136 Sample Buffer (Invitrogen, Carlsbad, CA, USA) was added to samples to 1X final  
137 concentration. Samples were boiled at 95 °C for 5 min, loaded into  
138 acrylamide/bisacrylamide gels and transferred to nitrocellulose membrane (GE  
139 Healthcare, Chicago, IL, USA). Membranes were blocked using PBS 0.1% tween 5% fat  
140 free milk for at least 30 min and incubated with primary antibodies diluted in PSB 5%  
141 normal horse serum overnight at 4 °C (**Table S1**). The following day, membranes were  
142 incubated with HRP coupled secondary antibodies diluted in PSB 5% normal horse  
143 serum for 1 h at room temperature (**Table S1**). Blots were visualized by addition of ECL

144 Western Blotting Substrate (Thermo Fisher Scientific, Waltham, MA, USA) following  
145 manufacturer's instructions. Blots were revealed using the imaging system ChemiDoc  
146 MP (BioRad, Hercules, CA, USA).

147

#### 148 **RNA extraction**

149 Total RNA was extracted from the HT29 spheroids using the RNeasy Mini Kit (Qiagen,  
150 Hilden, Germany) following the manufacturer's instruction. The quality was tested using  
151 an Agilent Bioanalyzer (Agilent, Santa Clara, CA, USA).

152

#### 153 **Gene expression profiling of treated and untreated HT29 spheroids**

154 Profiling was done using Affymetrix GeneChip HuGene 2.0 ST microarrays according to  
155 manufacturer instructions (Affymetrix, Thermo Fisher, Waltham, MA, USA). Expression  
156 data were analyzed by Robust Multichip Average (RMA) [26] in R using Bioconductor  
157 and associated packages. Prior to analysis, log<sub>2</sub>-transformed data were filtered out to  
158 exclude poorly expressed genes, defined as genes having a median expression level  
159 across all samples lower than the first quartile range. Data filtering resulted in 17,421  
160 annotated genes.

161 Unsupervised analysis, applied to the 3,131 genes with standard deviation (SD)>0.25,  
162 was performed with the Cluster program [27] using Pearson correlation and average  
163 linkage clustering as parameters. Results were displayed using TreeView program [27].  
164 Robustness of clusters was assessed with the R-package pvclust [28] with identical  
165 clustering parameters and 100 bootstrap replications. Ontology analysis of the gene  
166 clusters was based on GO biological processes of the Database for Annotation,  
167 Visualization and Integrated Discovery (DAVID; <http://david.abcc.ncifcrf.gov/>). The  
168 Consensus Molecular Subtype (CMS) classification [29] was applied to each cell culture  
169 condition by using the CMScaller tool from Eide et al. [30], providing a CMS score for  
170 each subtype (CMS1, CMS2, CMS3, and CMS4) to each condition.

171 Supervised analyses between the different cell culture conditions was applied by using  
172 Gene Set Enrichment Analysis (GSEA) (<http://www.broadinstitute.org/gsea/>) in order to  
173 identify the differential biological pathways. Analysis was focused on the 50-hallmark  
174 gene sets from the MSigDB v7.0 Molecular Signatures Database ([https://www.gsea-  
175 msigdb.org/gsea/msigdb](https://www.gsea-msigdb.org/gsea/msigdb)). We used the class differential metric to rank the filtered  
176 genes, weighted enrichment statistic for computing enrichment score (ES) of each gene  
177 set tested and 1000 permutations to evaluate significance as parameters for the GSEA.  
178 Significant gene sets were defined by a False Discovery Rate (FDR)-corrected p-value  
179  $<0.01$ . Metagenes from the significant gene sets were computed as the mean  
180 expression of core genes defined by the GSEA analysis.

181

## 182 **Gene expression profiling of human cancer colon samples**

183 We built a large database gathering our own data set and 10 publicly available sets as  
184 described [26]. These latter had been collected from the National Center for  
185 Biotechnology Information (NCBI)/Genbank GEO, ArrayExpress and TCGA databases  
186 (**Table S2**). Samples had been profiled using DNA microarrays (Affymetrix, Thermo  
187 Fisher, Waltham, MA, USA) or Illumina RNA sequencing (United kingdom, Cambridge).  
188 The whole data set included 2,239 primary colon cancer samples in the final analysis.  
189 Their clinicopathological characteristics are summarized in **Table 1**. The pre-analytic  
190 data processing and data analysis were done as previously described [26]. The CMS  
191 classification and the metagenes identified by supervised analyses in the HT29 cells  
192 were applied to each data set separately [29]. For these latter, the natural score of 0  
193 was used as threshold to define a sample as “positive” (score $>0$ ) or “negative”  
194 (score $<0$ ).

195

## 196 **Connectivity Map interrogation**



197 Finally, in order to identify potential therapies, we applied the Connectivity Map (CMap)  
198 analysis [31]. This analysis contains a perturbation-driven gene expression dataset of  
199 over a million of gene expression signatures associated with molecule compounds and  
200 genetic perturbations treatment on human cells. CMap (<https://clue.io/cmap>) searched  
201 for, among the L1000 signatures, the perturbagen's signatures that give significant  
202 correlation with those genes included in our two interest metagenes given by  
203 connectivity scores. The tested signatures were limited to those with a well-defined  
204 mechanism of action of treatment compounds, corresponding to 10,847 signatures of  
205 3,248 drugs through 57 cultured human cell lines. The significance threshold of the  
206 normalized connectivity score (ncs) was adjusted p-value <0.001. Because each drug  
207 has been used through multiple different culture conditions, we aggregated the  
208 significant signatures by drug class, computed for each class the average of normalized  
209 connectivity scores (average ncs) and assessed its statistical significance using one  
210 sample Student t-test.

211

## 212 **Statistical analysis**

213 Correlations between the "EMT-CHL model"-based classes and the clinicopathological  
214 variables were calculated with the Student's t-test for the continuous variables and the  
215 Fisher's exact test for the binary variables. The survival endpoint was relapse-free  
216 survival (RFS) calculated from the date of diagnosis until the date of relapse. The  
217 follow-up was measured from the date of diagnosis to the date of last news for event-  
218 free patients. Survival was calculated using the Kaplan-Meier method and curves were  
219 compared with the log-rank test. Univariate and multivariate analyses were done using  
220 Cox regression analysis (Wald test). The variables tested in univariate analysis included  
221 patients' age (> vs. ≤50 years) and gender (male vs. female), anatomic location  
222 (proximal vs. distal colon), pathological stage (2, 3, 4 vs. 1), pathological grade (2, 3 vs.  
223 1), CMS molecular subtypes (CMS2, CMS3, CMS4 vs. CMS1), and the "EMT-CHL

224 model"-based classes ("high-risk" vs. "low-risk"). Multivariate analysis incorporated all  
225 variables with a p-value inferior to 5% in univariate analysis. The likelihood ratio (LR)  
226 tests were used to assess the prognostic information provided beyond that of each  
227 metagene included in the Cox model, assuming a  $\chi^2$  distribution. Changes in the LR  
228 values (LR- $\Delta\chi^2$ ) quantified the relative amount of information of one Cox model  
229 compared with another. In order to build a prognostic Cox model for RFS combining our  
230 two metagenes, we randomly split the 1,837 informative primary samples in two sets,  
231 training and validation sets. The training set was composed of a quarter of the samples  
232 (n=450) and allowed to build the model. This model was then applied to the validation  
233 set composed of the 1,387 remaining samples, to estimate the robustness of the  
234 predictor. All statistical tests were two-sided at the 5% level of significance. Statistical  
235 analysis was done using the survival package (version 2.30) in the R software (version  
236 3.5.2).

237 **RESULTS**

238 **The EMT-inducing cocktail induces reversible loose micro-tissues, consistent**  
239 **with EMT and EMT-MET-like programs**

240 The EMT-inducing cocktail used for this study is a potent inducer of EMT [18, 20,  
241 32-35]. However, growth in 2D on plastic dishes offers unnatural growth kinetics and  
242 cells attachment, thus altering adhesion and related signaling pathways, and potentially  
243 biasing and/or masking EMT-induced signals. To study EMT induction in a more  
244 physiologic and dynamic model, we looked at the reversible effects of an EMT-inducing  
245 cocktail on cells grown in 3D as spheroids. We induced EMT on several colon cancer  
246 cell lines (HT29, HCT116, SW480). The most striking phenotype was observed with the  
247 HT29 colon cancer cell line, and we choose to continue with them. We used three  
248 conditions on HT29 spheroids: HT29 spheroids grown without any treatment (Baseline  
249 condition), HT29 spheroids exposed to the EMT-inducing cocktail for 5 days to induce  
250 EMT, and HT29 spheroids exposed to the EMT-inducing cocktail for 5 days, washed,  
251 then incubated for an additional 4 days without any treatment to mimic a sequential  
252 EMT followed by a MET process (**Figure 1A**).

253 In the absence of any specific treatment (Baseline), the spheroids continued to  
254 grow as dense spheroids during the whole protocol (**Figure 1B, top row**). When the  
255 EMT-inducing cocktail was added to the media (EMT condition) the spheroids became  
256 loose, with round cells at the periphery of the spheroid core, already after 3 days of  
257 treatment (**Figure 1B, middle row**). In the EMT-MET condition, the first 5 days were  
258 similar to the EMT condition, then during the following 3 days, *i.e.* after the removal of  
259 the EMT-inducing cocktail (MET-*like* program), the individualized round cells  
260 progressively reintegrated the spheroids core to form a homogeneous and compact  
261 spheroid (**Figure 1B, bottom row**).

262 We verified that the EMT-like phenotype induced by the EMT-inducing cocktail  
263 actually induced known EMT factors. We studied key molecules of EMT at the protein

264 level by western blotting. We compared Baseline microtissues samples to EMT and  
265 EMT-MET samples. The EMT-inducing cocktail induced the expression of specific  
266 mesenchymal proteins such as Fibronectin, ZEB1 and Vimentin (**Figure 1C**). All these  
267 markers went back to their respective baseline after removal of the EMT-inducing  
268 cocktail (*i.e.* Baseline condition and EMT-MET are similar). Conversely and as  
269 expected, the epithelial marker OCCLUDIN was downregulated during the EMT  
270 process.

271 Thus the EMT-inducing cocktail induced reversible macroscopic changes,  
272 phenotypically compatible with an EMT program induction.

273

274

### 275 **Transcriptomic analysis confirms the activation of EMT and EMT-MET programs** 276 **in spheroids treated with the EMT-inducing cocktail**

277 We surmised that the effect of the EMT-inducing cocktail was not limited to  
278 known EMT markers. To identify broad biological pathways activated by the EMT-  
279 inducing cocktail in treated spheroids, we performed DNA microarray analyses  
280 (Affymetrix™ GeneChip Human Gene 2.0 ST Assay) from the three conditions  
281 described above (Baseline, EMT, and EMT-MET, **Figure 1A**) and compared their  
282 expression profiles. Analyses were done at day 5 for Baseline and EMT samples and at  
283 day 7 for EMT-MET samples. Each condition was tested in triplicate. Unsupervised  
284 hierarchical clustering revealed, as expected, three distinct and coherent clusters,  
285 corresponding to each of the three conditions tested: Baseline, EMT, and EMT-MET  
286 (**Figure 1D**). The EMT and EMT-MET conditions were closer to each other than to the  
287 Baseline condition (**Figure 1D**). This is coherent with the fact that at day 7, spheroids  
288 were not fully back to baseline yet (**Figure 1B**). Visual inspection of gene clusters  
289 revealed two clusters, thereafter designated 1 and 2, that were deregulated from the  
290 Baseline condition to the EMT condition and showed opposite deregulation from the

291 EMT condition to the EMT-MET condition. Cluster 1 was upregulated in EMT condition  
292 and downregulated in EMT-MET condition: it included 198 genes with minimal Pearson  
293 correlation equal to 0.74. In term of ontologies, the DAVID GO biological processes  
294 associated with this cluster included cell migration ( $p=1.15E-04$ ), extracellular matrix  
295 organization ( $p=1.78E-04$ ), regulation of cell adhesion ( $p=7.87E-05$ ) and wound healing  
296 pathways ( $p=3.84E-03$ ). By contrast, Cluster 2 was downregulated in EMT condition  
297 and upregulated in EMT-MET condition: it included 296 genes with minimal Pearson  
298 correlation equal to 0.75. The GO biological processes represented in this cluster were  
299 related to cholesterol biosynthetic process ( $p=4.42E-20$ ), lipid metabolism ( $1.6E-02$ ) and  
300 metabolic pathways ( $p=1.22E-02$ ) (**Figure 1D, Table S3**). Thus, transcriptional analysis  
301 of the EMT and EMT-MET programs induced in the spheroids revealed a list of  
302 candidates and associated molecular pathways whose expression was modulated and  
303 reversible. Expected pathways related to cell migration and adhesion, known to be  
304 central to this reversible phenomenon, validated the biological relevance of our *in vitro*  
305 model that also revealed unexpected genes and pathways.

306

### 307 **Spheroids treated with the EMT-inducing cocktail shift toward the mesenchymal** 308 **consensus molecular subtypes (CMS4)**

309 The CMS classification distinguishes four subtypes of CRC based on the tumor's  
310 prominent biological profiles, each subtype having a defined prognosis: the CMS1  
311 microsatellite instability/immune subtype (hyper-mutated, microsatellite unstable and  
312 strong immune activation), the CMS2 canonical subtype (epithelial with marked WNT  
313 and MYC signaling activation), the CMS3 metabolic subtype (epithelial and neat  
314 metabolic dysregulation), and the CMS4 mesenchymal subtype (prominent TGF $\beta$   
315 activation, stromal invasion and angiogenesis) [36]. We surmised that genes expressed  
316 in the CMS4 mesenchymal class may be enriched in the EMT-inducing cocktail treated  
317 spheroids, but neither in the Baseline nor in the EMT-MET spheroids.

318 The CMS classification applied to the 3 cell culture conditions (Baseline, EMT  
319 and EMT-MET conditions) defined a CMS score for each subtype (CMS1, CMS2,  
320 CMS3, and CMS4) and for each cell culture condition (Baseline, EMT and EMT-MET  
321 conditions). As shown in **Figure 1E**, the prevalent score of Baseline samples  
322 corresponded to the CMS3 class (mean CMS3 score = 0.332). This result is coherent  
323 with a previous CMS classification of HT29 cells [37]. When compared with Baseline  
324 conditions, EMT samples showed a decrease of the CMS3 score ( $p=1.22E-02$ ) and an  
325 increase of the CMS4 score ( $p=9.58E-03$ ). Enrichment in CMS4 score (*i.e.*  
326 mesenchymal genes) was concordant with the induction of EMT. After the EMT-  
327 inducing cocktail removal (EMT-MET samples), the score for the CMS4 class  
328 decreased, as expected, while the score for the CMS2 class increased compared to the  
329 Baseline condition ( $p=2.57E-02$ ). This result showed that a pro-epithelial program  
330 (starting with a switch toward the CMS2 subtype) was re-activated once the EMT-  
331 inducing cocktail was removed from the culture. Altogether, the results showed that  
332 HT29 cells grown as spheroids and exposed to an EMT inducer activated a physiologic  
333 pro-mesenchymal transcriptomic program (the shift toward the CMS4 mesenchymal  
334 subtype) and that this process was reversible toward a pro-epithelial phenotype when  
335 the EMT inducer was removed. This observation further validated the relevance of our  
336 *in vitro* model.

337

338 **EMT genes, Bile Acid Metabolism and Cholesterol Homeostasis hallmark gene**  
339 **sets are affected during the EMT and EMT-MET programs**

340 To identify the biological pathways reversibly altered during the EMT process, we  
341 did a supervised analysis between the different cell culture conditions. Two  
342 comparisons were done: EMT *versus* Baseline samples (EMT induction), and EMT-  
343 MET *versus* EMT samples (MET induction). From these signatures, we used GSEA  
344 applied to the 50-hallmark gene sets from the MSigDB Molecular Signatures Database.

345 Our objective was to identify and select gene sets that showed an opposite pattern of  
346 variation in those two comparisons. Sixteen gene sets were differentially regulated at  
347 least in one comparison (q-value<1%) (**Figure 2A, grey background**), and three of them  
348 were significantly up- or downregulated in the EMT samples and returned to baseline  
349 levels in the EMT-MET samples (**Figure 2A, white background**). The “*Epithelio-*  
350 *Mesenchymal transition*” gene set was composed of 23 core genes upregulated in the  
351 EMT compared to Baseline samples (q-value = 5.61E-03) and 39 core genes  
352 downregulated in the EMT-MET compared to EMT samples (q-value < 1.00E-03) (**Table**  
353 **S4, columns 3 and 10 respectively, orange background**). The *Bile Acid Metabolism*  
354 gene set was composed of 33 core genes downregulated in the EMT compared to  
355 Baseline samples (q-value = 9.16E-03) and 33 core genes upregulated in the EMT-MET  
356 compared to EMT samples (q-value = 1.62E-03) (**Table S4, columns 3 and 10**  
357 **respectively, green background**). The *Cholesterol Homeostasis* gene set was composed  
358 of 31 core genes downregulated in the EMT samples compared to Baseline samples (q-  
359 value <1.00E-03) and 28 core genes upregulated in the EMT-MET compared to EMT  
360 samples (q-value= 2.64E-03) (**Table S4, columns 3 and 10 respectively, yellow**  
361 **background**). Among the core genes: 14 genes were retained in the “*Epithelio-*  
362 *Mesenchymal transition*” gene set, 17 in the “*Bile Acid Metabolism*” gene set, and 21 in  
363 the “*Cholesterol Homeostasis*” gene set, representing a total of 52 genes (**Figure 2B,**  
364 **Table S4 column 18**).

365 We built 3 independent metagenes from each of these three core gene sets. As  
366 shown in **Figure 2C**, each metagene was robust enough to distinguish the HT29  
367 samples according to their respective condition (Baseline, EMT, and EMT-MET): the  
368 “*Epithelio-Mesenchymal transition*” metagene score was the highest in the EMT  
369 samples compared to the Baseline samples (p-value=3.22E-06) and to the EMT-MET  
370 samples (p-value=1.25E-05). The “*Bile Acid Metabolism*” and the “*Cholesterol*  
371 *Homeostasis*” metagene scores were the lowest in the EMT samples compared to the



372 Baseline samples (p-value=2.08E-04 and p-value=1.70E-05 respectively) and to the  
373 EMT-MET samples (p-value=2.08E-04 and p-value=1.70E-05, respectively). Altogether,  
374 this procedure allowed us to identify 52 genes reversibly regulated during the EMT and  
375 the EMT-MET programs. Those genes, when separated into three distinct metagenes  
376 based on their hallmark ontology, could also individually distinguished an active from an  
377 inactive EMT program in tumor cells.

378

### 379 ***In vitro* derived metagenes show independent prognostic value in colon cancer**

380 Given the known link between EMT and the metastatic process, we assessed the  
381 prognostic value of each metagene (positive *versus* negative) in a large gene  
382 expression database of untreated human colon cancer samples (**Table S2**). This base  
383 included 2,239 clinically annotated primary colon tumors, including 1,837 with available  
384 Recurrence-Free Survival (RFS) data. In univariate analysis, the “*Bile Acid Metabolism*”  
385 metagene was not prognostic (**Figure 3A**). By contrast, the positive “*Epithelio-*  
386 *Mesenchymal transition*” metagene (HR=1.37, [95CI 1.14-1.64]; p=6.28E-04, Wald test)  
387 and negative “*Cholesterol Homeostasis*” metagene (HR=1.25, [95CI 1.04-1.49];  
388 p=1.64E-02, Wald test) were associated with shorter RFS, and showed independent  
389 prognostic value in multivariate analysis (**Figure 3B**). The **Figure 3C** shows the Kaplan-  
390 Meier curves for RFS in four groups defined by each significant metagene: the 5-year  
391 RFS was 77% (95%CI 73-82) in the “*Epithelio-Mesenchymal transition*”-  
392 negative/“*Cholesterol Homeostasis*”-positive group, 71% (95%CI 67-77) “*Epithelio-*  
393 *Mesenchymal transition*”-negative/“*Cholesterol Homeostasis*”-negative group, 70%  
394 (95%CI 65-75) in the “*Epithelio-Mesenchymal transition*”-positive/“*Cholesterol*  
395 *Homeostasis*”-positive group, and 65% (95%CI 60-70) in the “*Epithelio-Mesenchymal*  
396 *transition*”-positive/“*Cholesterol Homeostasis*”-negative group (p=4.61E-04; log-rank  
397 test). Such prognostic complementarity was confirmed using the likelihood ratio (LR)  
398 test (**Table S5**): the “*Cholesterol Homeostasis*” metagene added prognostic information



399 to that provided by “*Epithelio-Mesenchymal transition*” metagene ( $\Delta\text{LR-X2}=5.21$ ,  
400  $p=2.24\text{E-}02$ ), and the “*Epithelio-Mesenchymal transition*” metagene added prognostic  
401 information to that provided by the “*Cholesterol Homeostasis*” metagene ( $\Delta\text{LR-}$   
402  $X2=13.26$ ,  $p=2.72\text{E-}04$ ).

403

404 ***The model combining the “Epithelial Mesenchymal Transition” and the***  
405 ***“Cholesterol Homeostasis” metagenes is a robust prognostic factor for RFS in***  
406 ***CRC***

407 Based on these results, we built a multigene model combining the “*Epithelial*  
408 *Mesenchymal Transition*” (14 genes) and the “*Cholesterol Homeostasis*” (21 genes)  
409 metagenes, thereafter designated “EMT-CHL model”. We randomly split the 1,837  
410 informative primary samples in two sets: a training set composed of a quarter of the  
411 samples ( $n=450$ ) to build the model, and a validation set composed of the 1,387  
412 remaining samples (**Table 2**) to test its robustness. As expected, in the training set, the  
413 model showed a difference between the 5-year RFS of the “low-risk” class (75% [CI95  
414 69-83];  $n=225$ ) and the “high-risk” class (66% [CI95 59-74];  $n=225$ ;  $p=9.93\text{E-}03$ , log-  
415 rank test; (**Figure 3D, left panel**). Importantly, the model maintained its prognostic value  
416 in the validation set, with 74% 5-year RFS in the “low-risk” class (CI95 70-78;  $n=672$ )  
417 versus 68% in the “high-risk” class (CI95 64-72;  $n=71$ ;  $p=1.68\text{E-}23$ , log-rank test)  
418 (**Figure 3D, right panel**).

419 The correlation of the “EMT-CHL model”-based classes with clinicopathological  
420 variables in the validation set are shown in **Table 2**. When compared with the “low-risk”  
421 class, the “high-risk” class was associated with more female ( $p=2.0\text{E-}03$ , Fisher’s exact  
422 test), more pathological stage 3 ( $p=3.0\text{E-}04$ , Fisher’s exact test), and more CMS1 and  
423 CMS4 subtypes ( $p=3.5\text{E-}33$ , Fisher’s exact test). We then compared the prognostic  
424 value of our “EMT-CHL model” with that of other clinicopathological factors in the  
425 validation set in univariate and multivariate analyses (**Table 3**). The other variables

426 significant in univariate analysis were the pathological stage ( $p=3.1E-10$ ) and the CMS  
427 classification ( $p=2.3E-03$ , Wald test). In multivariate analysis, the pathological stage  
428 and our multigene model ( $p=4.0E-02$ , Wald test) remained significant but not the CMS  
429 classification. Altogether these analyses showed that our “EMT-CHL” model was a  
430 robust and independent prognostic factor for RFS in primary colon cancer.

431

432 ***CMap analysis revealed inhibitors and antagonists that might affect the EMT and***  
433 ***EMT-MET programs***

434 We then searched for drugs that might affect (promote or inhibit) the plasticity of  
435 the EMT and/or EMT-MET programs. We submitted the 35 genes of the EMT-CHL  
436 model to Connectivity Map (CMap), which reports the transcriptional responses of  
437 human cells to a variety of chemical or genetic perturbations [31]. The resulting  
438 connectivity scores reflect the level of agreement between the tested signature and the  
439 L1000 profiles/signatures. Analysis was limited to the 10,847 signatures related to  
440 treatment compounds with known mechanism of action through 57 cultured human cell  
441 lines: 761 signatures had significant correlation (normalized connectivity score (ncs) *i.e.*  
442 adjusted  $p$ -value  $<0.001$ ) with the “EMT-CHL” model genes through 47 human cell lines  
443 over 309 drugs compounds (representing 145 drug classes; **Table S6**). We aggregated  
444 the significant signatures by drug class and computed the average ncs for each class:  
445 98 drug classes were significant. **Table 4** shows the top 15 drug classes identified,  
446 which includes antagonists/inhibitors of Dopamine receptor, EGFR, Serotonin receptor,  
447 PDGFR, BCR-ABL, ABL, Histamine receptor, KIT, Adrenergic receptor, HMG-CoA  
448 reductase (HMGCR), SRC, Calcium channel, Tricyclic antidepressant, Estrogen  
449 receptor, and VEGFR. All connectivity scores were negatively correlated with our  
450 signature, suggesting that these drugs might interfere with the EMT-MET process.

451

452 ***Blocking enzymes from the cholesterol pathway prevents the execution of the***  
453 ***EMT-MET program***

454 We first confirmed that HMGCR and DHCR7 were downregulated during the  
455 EMT process and came back to a control level during the MET process due to release  
456 of the EMT-inducing treatment (**Figure S1**). From the candidates identified above, we  
457 chose to test the HMGCR inhibitors, which directly target the cholesterol pathway. We  
458 selected two statins, Lovastatin and Simvastatin, and applied them on 2-days-old  
459 organoids (**Figure 4A**). Even at high concentration of each statin, we did not observe  
460 any change in the phenotypical aspect of the microtissues when added alone (**Figure**  
461 **4B, C** for *Simvastatin*) or in co-treatment with the EMT-inducing cocktail (*Data not*  
462 *shown*) compared to the EMT-inducing factor alone. However, when statins were added  
463 after a pre-treatment with the EMT-inducing cocktail, *i.e.* during the EMT-MET program  
464 (**Figure 4D**), we observed that the treated spheroids maintained a loose EMT-like  
465 phenotype instead of reversing to dense spheroids, as those observed with the Baseline  
466 situation (**Figure 4E, F**). This result showed that inhibiting the cholesterol pathway after  
467 EMT induction prevented the completion of the MET program, in the absence of EMT  
468 inducing factors, highlighting the importance of the regulation of the cholesterol pathway  
469 during the EMT-MET programs.

470

471 **Discussion**

472 EMT implication in oncogenesis and metastasis has been extensively studied  
473 showing the role of many transcription (e.g. TWIST) and secreted factors (e.g.  
474 TGF $\beta$ ). However, progress is necessary to better understand this implication and to  
475 provide therapeutic targets [9, 22, 23, 38]. The novelty of our study rely on the  
476 combination of the broad induction of EMT using an EMT-inducing cocktail, a 3D model  
477 and the timeline approach of EMT-MET induction programs.

478 This allowed the identification of two sets of genes reversibly regulated during  
479 either the induction of EMT or the EMT-MET program. The two key pathways retained  
480 for our model comprised genes from the EMT pathway, as expected, but also more  
481 surprisingly, genes from the cholesterol pathway. When combined as a multigene  
482 model, they showed an independent prognostic value in a large dataset of patients with  
483 primary colorectal cancer, highlighting the clinical relevance of our finding.

484 .

485 When analyzed in detail, we found that the 14 genes related to the EMT pathway  
486 and reversibly modified in response to the EMT-inducing cocktail were genes induced  
487 by TGF $\beta$  (*PMEPA1*, *CTGF*, *TAGLN*, *CYR61* ...). They have also been involved in cell  
488 migration (*TNC*, *IL8*, *TAGLN*, *FLNA*, *SERPINE1*, *MYL9*, *CYR61*, *GPC1*...) in various  
489 cancers. At least four of them promoted colorectal liver metastasis through  
490 enhancement of the EMT program (*THBS1*, *TAGLN*, *ITGA2*, *FLNA*). Several of them  
491 code for surface glycoproteins or integrin-related molecules (*PMEPA1*, *TAGLN*,  
492 *SERPINE1*, *THBS1*, *GPC1*). Some or a combination of these genes might be used as  
493 biomarkers for EMT to identify CRC patients potentially more at risk to relapse [39-46].

494 The involvement of the cholesterol pathway inhibition (during EMT) and re-  
495 activation (during EMT-MET) is a new and intriguing finding. The 21 genes of the  
496 cholesterol metagene code for most (if not all) enzymes responsible for the synthesis of  
497 cholesterol (highlighted in red in **Figure 5**). Cholesterol is essential for cell function and

498 viability. It is a component of the plasma membrane and lipid rafts, a signaling molecule  
499 (ligand for estrogen-related receptor alpha (ESRRA)), and a precursor for steroid  
500 hormones, Vitamin D and bile acids. The bile acid pathway was also found  
501 downregulated during EMT and activated during the EMT-MET programs but did not  
502 have prognostic value in our study. Many reports have suggested that cholesterol  
503 pathway activation is important for stem cells maintenance in tissues but also for other  
504 pro-metastatic function, such as proliferation, survival and resistance to treatment [47].  
505 All these features are associated with pejorative prognosis. Cholesterol synthesis is  
506 enhanced in cancer cells compared to normal cells [48, 49]. Additionally, patients with  
507 high cholesterol levels have an increased risk for many cancers [48, 49]. But thus far,  
508 clinical trials with HMGCR inhibitors (statins) have had mixed results [50, 51]. In our  
509 case, activation of the cholesterol synthesis pathway tended to be of better prognosis.  
510 Due to its multiple biological roles including in tissue homeostasis, cholesterol might  
511 have several roles depending on conditions, cells type or timing. Changes in one of  
512 these variables might reveal different functionalities. Compared to previous results, our  
513 dynamic model enriched the “EMT field” by highlighting the role of cholesterol regulation  
514 in relationship with the triggering of cell detachment signal and cell plasticity. Phenotypic  
515 plasticity may provide cancer cells with increased adaptability and resistance, enabling  
516 them to respond to a variety of external cues and physiological stresses, including EMT  
517 signals. In addition to highlighting the reversibility of the cholesterol pathway activation  
518 during EMT-MET programs, we also showed that *in vitro* blockade of the cholesterol  
519 pathway altered the execution of the EMT-MET program. One hypothesis is that, in the  
520 context of tumor cell motility and migration, EMT requires lowering the synthesis of  
521 cholesterol to ensure the destabilization of lipid rafts and/or to allow more flexibility in  
522 cell membrane for migration. In this line, in breast and hepatocellular carcinomas, CD44  
523 affinity for cholesterol-rich lipid rafts and retention inside lipid rafts prevent migration [52-  
524 56]. Also, statins induce disruption of lipid rafts, impairing tumor cell adhesion, but

525 enhance invasive and metastatic ability of cancer cells [52-56]. The molecular  
526 mechanism involved remains however to be fully elucidated. Altogether, these results  
527 suggest that beside or through their lipid lowering property, factors such as statins might  
528 also influence complex cell biological programs, during oncogenesis such as EMT.

529         Similar findings (simultaneous opposite involvement of EMT and cholesterol  
530 pathways) in pancreatic ductal adenocarcinoma (PDAC) revealed that cholesterol  
531 pathway inhibition induces TGF $\beta$  signaling and promotes basal differentiation [21]. More  
532 specifically, the disruption of cholesterol biosynthesis by *Nsdhl* knockout (in mice) or  
533 treatment with statins (in mice and in humans) induces the switch from a glandular to a  
534 squamous PDAC subtype (mesenchymal subtype). In line with this, a previous study  
535 suggested that human tumor cells belonging to the quasi-mesenchymal/squamous/  
536 basal subtype of PDAC utilize transcriptionally-dominated programs to lose their  
537 epithelial phenotype during EMT, while those belonging to the classical/pancreatic  
538 progenitor/ADEX subtype rely on protein re-localization to lose their epithelial phenotype  
539 during EMT [57]. This recent discovery now reveals that this glandular to squamous  
540 PDAC switch can occur *via* the activation of SREBP1, which induces TGF $\beta$ 1  
541 expression, autocrine TGF $\beta$ -SMAD2/3 signaling and EMT. In line with this major finding,  
542 we showed that inducing EMT in our model can switch a cell line from a CMS3 subtype  
543 to a CMS4 mesenchymal subtype using a transcriptionally-dominated program [36],  
544 connecting this switch to a more pejorative prognosis. Accordingly, we found that the  
545 CMS4 subtype [36] was enriched in the “high-risk” prognostic group, *i.e* “EMT high,  
546 Cholesterol down”. It is thus possible that a general mechanism promoting  
547 basal/squamous/mesenchymal differentiation with the transcriptional downregulation of  
548 the cholesterol pathway and the upregulation of TGF $\beta$  related genes occurs in multiple  
549 tumor types (**Figure 5**). Moreover, it was reported that TGF $\beta$ -induced mitotic defects in  
550 proliferating cells are reversible upon its withdrawal, whereas the acquired genomic  
551 abnormalities persist, leading to increased tumorigenic phenotypes. Tumor cells

552 differentiation might thus result from a different degree of EMT depending on several  
553 factors, genetic and non-genetic such as the microenvironment and the various  
554 treatments [58].

555 In parallel, and in line with this hypothesis, it would be of interest to identify  
556 patients who received statins prior to their diagnosis of colorectal cancer and test if  
557 these patient's tumors are more of the CMS4 subtype. As shown in the PDAC study,  
558 this would suggest that the lowering of the cholesterol pathway can indeed influence the  
559 subtype of the growing carcinoma, which would be a major discovery in the field. Our *in*  
560 *vitro* data however suggested that cholesterol lowering effects, notably when using  
561 statins, occurs only during a specific window to antagonize the MET program. We  
562 cannot exclude that a feedback loop between EMT and cholesterol pathways might also  
563 exist, which will add a new layer of complexity to this already intricate subject.

## 564 References

565

- 566 1. Wang, J., et al., *Metastatic patterns and survival outcomes in patients with stage IV colon cancer: A*  
567 *population-based analysis*. *Cancer Med*, 2020. **9**(1): p. 361-373.
- 568 2. Lamouille, S., J. Xu, and R. Derynck, *Molecular mechanisms of epithelial-mesenchymal transition*.  
569 *Nat Rev Mol Cell Biol*, 2014. **15**(3): p. 178-96.
- 570 3. Batlle, E., et al., *The transcription factor snail is a repressor of E-cadherin gene expression in*  
571 *epithelial tumour cells*. *Nat Cell Biol*, 2000. **2**(2): p. 84-9.
- 572 4. Cano, A., et al., *The transcription factor snail controls epithelial-mesenchymal transitions by*  
573 *repressing E-cadherin expression*. *Nat Cell Biol*, 2000. **2**(2): p. 76-83.
- 574 5. Yoshida, G.J. and H. Saya, *Molecular pathology underlying the robustness of cancer stem cells*.  
575 *Regen Ther*, 2021. **17**: p. 38-50.
- 576 6. Bragado, P., et al., *TGF-beta2 dictates disseminated tumour cell fate in target organs through TGF-*  
577 *beta-RIII and p38alpha/beta signalling*. *Nat Cell Biol*, 2013. **15**(11): p. 1351-61.
- 578 7. Xu, J., S. Lamouille, and R. Derynck, *TGF-beta-induced epithelial to mesenchymal transition*. *Cell*  
579 *Res*, 2009. **19**(2): p. 156-72.
- 580 8. Jayachandran, J., H. Srinivasan, and K.P. Mani, *Molecular mechanism involved in epithelial to*  
581 *mesenchymal transition*. *Arch Biochem Biophys*, 2021: p. 108984.
- 582 9. Thiery, J.P. and J.P. Sleeman, *Complex networks orchestrate epithelial-mesenchymal transitions*. *Nat*  
583 *Rev Mol Cell Biol*, 2006. **7**(2): p. 131-42.
- 584 10. Kanazawa, T., et al., *TLS/FUS-ERG fusion gene in acute lymphoblastic leukemia with*  
585 *t(16;21)(p11;q22) and monitoring of minimal residual disease*. *Leuk Lymphoma*, 2005. **46**(12): p.  
586 1833-5.
- 587 11. Dissanayake, S.K., et al., *The Wnt5A/protein kinase C pathway mediates motility in melanoma cells*  
588 *via the inhibition of metastasis suppressors and initiation of an epithelial to mesenchymal*  
589 *transition*. *J Biol Chem*, 2007. **282**(23): p. 17259-71.
- 590 12. Chruscik, A., V. Gopalan, and A.K. Lam, *The clinical and biological roles of transforming growth*  
591 *factor beta in colon cancer stem cells: A systematic review*. *Eur J Cell Biol*, 2018. **97**(1): p. 15-22.
- 592 13. Ren, J., et al., *SFRP1 inhibits epithelial-mesenchymal transition in A549 human lung*  
593 *adenocarcinoma cell line*. *Cancer Biother Radiopharm*, 2013. **28**(7): p. 565-71.
- 594 14. Chung, M.T., et al., *SFRP1 and SFRP2 suppress the transformation and invasion abilities of cervical*  
595 *cancer cells through Wnt signal pathway*. *Gynecol Oncol*, 2009. **112**(3): p. 646-53.
- 596 15. Duan, H., et al., *TET1 inhibits EMT of ovarian cancer cells through activating Wnt/beta-catenin*  
597 *signaling inhibitors DKK1 and SFRP2*. *Gynecol Oncol*, 2017. **147**(2): p. 408-417.
- 598 16. Yue, B., et al., *LncRNA-ATB mediated E-cadherin repression promotes the progression of colon*  
599 *cancer and predicts poor prognosis*. *J Gastroenterol Hepatol*, 2016. **31**(3): p. 595-603.
- 600 17. Hu, Y., et al., *Epigenetic suppression of E-cadherin expression by Snail2 during the metastasis of*  
601 *colorectal cancer*. *Clin Epigenetics*, 2018. **10**(1): p. 154.
- 602 18. Scheel, C., et al., *Paracrine and autocrine signals induce and maintain mesenchymal and stem cell*  
603 *states in the breast*. *Cell*, 2011. **145**(6): p. 926-40.
- 604 19. Tang, Y., et al., *Induction and analysis of epithelial to mesenchymal transition*. *J Vis Exp*, 2013(78).
- 605 20. Liu, Y.L., et al., *Assessing metastatic potential of breast cancer cells based on EGFR dynamics*. *Sci*  
606 *Rep*, 2019. **9**(1): p. 3395.
- 607 21. Gabitova-Cornell, L., et al., *Cholesterol Pathway Inhibition Induces TGF-beta Signaling to Promote*  
608 *Basal Differentiation in Pancreatic Cancer*. *Cancer Cell*, 2020. **38**(4): p. 567-583 e11.
- 609 22. Fazilaty, H., et al., *A gene regulatory network to control EMT programs in development and disease*.  
610 *Nat Commun*, 2019. **10**(1): p. 5115.
- 611 23. Jia, D., et al., *Testing the gene expression classification of the EMT spectrum*. *Phys Biol*, 2019. **16**(2):  
612 p. 025002.



- 613 24. Chitcholtan, K., et al., *Differences in growth properties of endometrial cancer in three dimensional*  
614 *(3D) culture and 2D cell monolayer*. *Exp Cell Res*, 2013. **319**(1): p. 75-87.
- 615 25. Melissaridou, S., et al., *The effect of 2D and 3D cell cultures on treatment response, EMT profile and*  
616 *stem cell features in head and neck cancer*. *Cancer Cell Int*, 2019. **19**: p. 16.
- 617 26. Irizarry, R.A., et al., *Exploration, normalization, and summaries of high density oligonucleotide array*  
618 *probe level data*. *Biostatistics*, 2003. **4**(2): p. 249-64.
- 619 27. Eisen, M.B., et al., *Cluster analysis and display of genome-wide expression patterns*. *Proc Natl Acad*  
620 *Sci U S A*, 1998. **95**(25): p. 14863-8.
- 621 28. Suzuki, R. and H. Shimodaira, *Pvclust: an R package for assessing the uncertainty in hierarchical*  
622 *clustering*. *Bioinformatics*, 2006. **22**(12): p. 1540-2.
- 623 29. Bertucci, F., et al., *EndoPredict predicts for the response to neoadjuvant chemotherapy in ER-*  
624 *positive, HER2-negative breast cancer*. *Cancer Lett*, 2014. **355**(1): p. 70-5.
- 625 30. Eide, P.W., et al., *CMScaller: an R package for consensus molecular subtyping of colorectal cancer*  
626 *pre-clinical models*. *Sci Rep*, 2017. **7**(1): p. 16618.
- 627 31. Subramanian, A., et al., *A Next Generation Connectivity Map: L1000 Platform and the First*  
628 *1,000,000 Profiles*. *Cell*, 2017. **171**(6): p. 1437-1452 e17.
- 629 32. Siddiqui, A., et al., *Thymidylate synthase is functionally associated with ZEB1 and contributes to the*  
630 *epithelial-to-mesenchymal transition of cancer cells*. *J Pathol*, 2017. **242**(2): p. 221-233.
- 631 33. Druzhkova, I., et al., *E-Cadherin in Colorectal Cancer: Relation to Chemosensitivity*. *Clin Colorectal*  
632 *Cancer*, 2019. **18**(1): p. e74-e86.
- 633 34. Brodaczewska, K.K., et al., *Metastatic renal cell carcinoma cells growing in 3D on polyDlysine or*  
634 *laminin present a stemlike phenotype and drug resistance*. *Oncol Rep*, 2019. **42**(5): p. 1878-1892.
- 635 35. Dang, H.X., et al., *Long non-coding RNA LCAL62 / LINC00261 is associated with lung*  
636 *adenocarcinoma prognosis*. *Heliyon*, 2020. **6**(3): p. e03521.
- 637 36. Guinney, J., et al., *The consensus molecular subtypes of colorectal cancer*. *Nat Med*, 2015. **21**(11): p.  
638 1350-6.
- 639 37. Sveen, A., et al., *Colorectal Cancer Consensus Molecular Subtypes Translated to Preclinical Models*  
640 *Uncover Potentially Targetable Cancer Cell Dependencies*. *Clin Cancer Res*, 2018. **24**(4): p. 794-806.
- 641 38. Lavin, D.P. and V.K. Tiwari, *Unresolved Complexity in the Gene Regulatory Network Underlying EMT*.  
642 *Front Oncol*, 2020. **10**: p. 554.
- 643 39. Cheng, M., et al., *FLNA promotes chemoresistance of colorectal cancer through inducing epithelial-*  
644 *mesenchymal transition and smad2 signaling pathway*. *Am J Cancer Res*, 2020. **10**(2): p. 403-423.
- 645 40. Takahashi, Y., et al., *Tumor-derived tenascin-C promotes the epithelial-mesenchymal transition in*  
646 *colorectal cancer cells*. *Anticancer Res*, 2013. **33**(5): p. 1927-34.
- 647 41. Li, J., et al., *The clinical significance of circulating GPC1 positive exosomes and its regulative miRNAs*  
648 *in colon cancer patients*. *Oncotarget*, 2017. **8**(60): p. 101189-101202.
- 649 42. Huang, X., et al., *Snail/FOKK1/Cyr61 Signaling Axis Regulates the Epithelial-Mesenchymal Transition*  
650 *and Metastasis in Colorectal Cancer*. *Cell Physiol Biochem*, 2018. **47**(2): p. 590-603.
- 651 43. Jeong, D., et al., *Cyr61 expression is associated with prognosis in patients with colorectal cancer*.  
652 *BMC Cancer*, 2014. **14**: p. 164.
- 653 44. Bie, Y., et al., *The Crucial Role of CXCL8 and Its Receptors in Colorectal Liver Metastasis*. *Dis Markers*,  
654 2019. **2019**: p. 8023460.
- 655 45. Long, X., et al., *IL-8, a novel messenger to cross-link inflammation and tumor EMT via autocrine and*  
656 *paracrine pathways (Review)*. *Int J Oncol*, 2016. **48**(1): p. 5-12.
- 657 46. Yang, J.D., L. Ma, and Z. Zhu, *SERPINE1 as a cancer-promoting gene in gastric adenocarcinoma:*  
658 *facilitates tumour cell proliferation, migration, and invasion by regulating EMT*. *J Chemother*, 2019.  
659 **31**(7-8): p. 408-418.
- 660 47. McCorry, A.M., et al., *Epithelial-to-mesenchymal transition signature assessment in colorectal*  
661 *cancer quantifies tumour stromal content rather than true transition*. *J Pathol*, 2018. **246**(4): p. 422-  
662 426.
- 663 48. Vona, R., E. Iessi, and P. Matarrese, *Role of Cholesterol and Lipid Rafts in Cancer Signaling: A*  
664 *Promising Therapeutic Opportunity?* *Front Cell Dev Biol*, 2021. **9**: p. 622908.

- 665 49. Beck, B. and C. Blanpain, *Unravelling cancer stem cell potential*. Nat Rev Cancer, 2013. **13**(10): p.  
666 727-38.
- 667 50. Krens, L.L., et al., *Statin use is not associated with improved progression free survival in cetuximab*  
668 *treated KRAS mutant metastatic colorectal cancer patients: results from the CAIRO2 study*. PLoS  
669 One, 2014. **9**(11): p. e112201.
- 670 51. Shao, Y.Y., et al., *Statin Use Is Associated With Improved Prognosis of Colorectal Cancer in Taiwan*.  
671 Clin Colorectal Cancer, 2015. **14**(3): p. 177-184 e4.
- 672 52. Yang, Z., et al., *Cholesterol inhibits hepatocellular carcinoma invasion and metastasis by promoting*  
673 *CD44 localization in lipid rafts*. Cancer Lett, 2018. **429**: p. 66-77.
- 674 53. Babina, I.S., et al., *A novel mechanism of regulating breast cancer cell migration via palmitoylation-*  
675 *dependent alterations in the lipid raft affiliation of CD44*. Breast Cancer Res, 2014. **16**(1): p. R19.
- 676 54. Donatello, S., et al., *Lipid raft association restricts CD44-ezrin interaction and promotion of breast*  
677 *cancer cell migration*. Am J Pathol, 2012. **181**(6): p. 2172-87.
- 678 55. Murai, T., *The role of lipid rafts in cancer cell adhesion and migration*. Int J Cell Biol, 2012. **2012**: p.  
679 763283.
- 680 56. Murai, T., et al., *Low cholesterol triggers membrane microdomain-dependent CD44 shedding and*  
681 *suppresses tumor cell migration*. J Biol Chem, 2011. **286**(3): p. 1999-2007.
- 682 57. Aiello, N.M., et al., *EMT Subtype Influences Epithelial Plasticity and Mode of Cell Migration*. Dev  
683 Cell, 2018. **45**(6): p. 681-695 e4.
- 684 58. Comaills, V., et al., *Genomic Instability Is Induced by Persistent Proliferation of Cells Undergoing*  
685 *Epithelial-to-Mesenchymal Transition*. Cell Rep, 2016. **17**(10): p. 2632-2647.

686

## 687 **Acknowledgements**

688 This work has been supported by Inserm/Institut Paoli-Calmettes and grants from the AP-  
689 HM AORC Junior 2018, Canceropole PACA 2018, GIRCI Méditerranée 2019. A.A. is  
690 supported by a postdoctoral fellowship from the "Fondation ARC" (n°PDF20180507565)  
691 and the "Fondation de France" (n°00107936). We want to thank C. Lachaud for sharing  
692 the chemidoc equipment.

693

694

695 **Figure legends**

696

697 **Figure 1: Characterization and validation of the EMT induced model**

698 Cells were grown in 3D in ULA plate for 2 days (Day-2). At day 0, the EMT and EMT-MET  
699 samples were treated with the EMT-inducing cocktail for 5 days. For EMT-MET samples,  
700 the spheroids were washed off the EMT-inducing cocktail and grown for 4 more days in  
701 normal medium. **A)** Experimental setting. **B)** Representative photos of the spheroids for  
702 the baseline, EMT, EMT-MET conditions, at days 0, 3, 5, 7 and 9. **C)** Western Blots of  
703 proteins involved in EMT: FIBRONECTIN, ZEB1, VIMENTIN, OCCLUDIN. ACTIN was  
704 used as loading control. **D)** Hierarchical clustering of triplicate samples of three conditions  
705 i.e. baseline, EMT and EMT-MET and 3,131 genes based on mRNA expression levels with  
706 standard deviation (SD)>0.25. Each row represents a gene and each column represents a  
707 sample. Robust clusters defined by pvclust with an approximately unbiased p-value>100%  
708 and identified with (an asterisk and) the associated Pearson correlation. **E)** The  
709 Consensus Molecular Subtype (CMS) classification was applied to mRNA expression  
710 profile of each sample by using the CMScaller tool from Eide et al. [21], providing a score  
711 for the four CMS subtypes (CMS1, CMS2, CMS3, and CMS4). Box plot comparing the four  
712 CMS scores according each condition (baseline, EMT or EMT-MET). The significant  
713 differences defined by one-way ANOVA post hoc Tukey test are visualized with an arrow  
714 and p-value are indicated as follows. \* :  $p < 0.05$ , \*\*:  $p < 0.01$

715

716 **Figure 2. Epithelial to Mesenchymal transition pathways, Cholesterol homeostasis**  
717 **and bile acid metabolism are inversely regulated by the addition and the release of**  
718 **the EMT-inducing cocktail**

719 **A)** Sixteen gene-sets out from the MSigDB Molecular Signatures Database (GSEA) were  
720 differentially regulated in at least one comparison (q-value<1%): Baseline vs EMT or EMT

721 vs EMT-MET. The 3 gene sets inversely regulated in the two conditions were “*Epithelial*  
722 *Mesenchymal Transition*”, “*Bile Acid Metabolism*”; “*Cholesterol Homeostasis*” (white  
723 background). **B)** Heatmap of metagenes in the nine samples ordered by condition i.e.  
724 Baseline, MT and EMT-MET conditions. Metagene of the three gene sets that were  
725 significantly and oppositely deregulated in both comparisons were built using the core  
726 genes defined in GSEA analysis: “*Epithelial Mesenchymal Transition*” (14 genes); “*Bile*  
727 *Acid Metabolism*” (17 genes); “*Cholesterol Homeostasis*” (21 genes). **C)** Box plot  
728 comparing the three individual metagenes according each condition (baseline, EMT or  
729 EMT-MET). P-values (ANOVA post hoc Tukey test) are indicated as follows \*\*\*  $p < 0.001$ .

730

731

732 **Figure 3: Epithelial to Mesenchymal transition pathways and Cholesterol**  
733 **homeostasis have synergic prognostic value in patients.**

734 Patients were classified as positive or negative according to their metagenes scores. **A)**  
735 Kaplan-Meier curves for recurrence free survival (RFS) of 1887 CRC patients assessed  
736 using the log-rank test, for the 3 metagenes: “*Epithelial Mesenchymal Transition*”, “*Bile*  
737 *Acid Metabolism*” and “*Cholesterol Homeostasis*”. **B)** Forest plot showing the hazard ratio  
738 for survival events of each GSEA metagene and recurrence-free survival in CRC patients  
739 in univariate and multivariate analysis. A ratio greater than one indicates a poor prognosis  
740 and a ratio lower than one indicates good prognosis. The black squares correspond to  
741 significant genes and the grey ones to non-significant and the lines defined the 95%  
742 confidence interval. **C)** Kaplan-Meier curves for RFS according to four groups: *Epithelio-*  
743 *Mesenchymal transition*”-negative/“*Cholesterol Homeostasis*”-positive” group (green,  
744  $n=452$ ), “*Epithelio-Mesenchymal transition*”-negative/“*Cholesterol Homeostasis*”-negative  
745 group (black,  $n=445$ ), “*Epithelio-Mesenchymal transition*”-positive/“*Cholesterol*  
746 *Homeostasis*”-positive group (blue,  $n=481$ ), and “*Epithelio-Mesenchymal transition*”-

747 positive/“*Cholesterol Homeostasis*”-negative group (red, n=459). **D)** Kaplan-Meier curves  
748 for survival model derived from the fusion of and Cholesterol Homeostasis metagenes  
749 (“*Epithelial Mesenchymal Transition*” and “*Cholesterol Homeostasis*”).) in the training  
750 (n=450) and the validation (n=1387) sets.

751

752 **Figure 4: Morphological changes induced with statins depending on the EMT-MET**  
753 **status**

754 For these experiments, cells were grown in ULA plate for 2 days (Day-2) as dense  
755 spheroids. Two setting were then used. **A-C)** First setting: From day 0 to day 5, spheroids  
756 were either cultured with regular media (baseline), or co-treated with the EMT-inducing  
757 cocktail plus DMSO or the EMT-inducing cocktail plus simvastatin. **A)** Experimental  
758 setting. **B)** Representative photos of the spheroids in baseline, DMSO and Simvastatin  
759 conditions. **C)** Quantification of the spheroid size in arbitrary unit (no significant statistical  
760 differences).

761 **D-F)** Second setting: From day 0 to day 5, spheroids were treated with the EMT-inducing  
762 cocktail. Then, the EMT-inducing cocktail was washed out and replaced with medium,  
763 DMSO (0.5 %), Ethanol (0.5 %), Simvastatin (50  $\mu$ M), or Lovastatin (50  $\mu$ M) for 5 days. **D)**  
764 Experimental setting. **E)** Representative photos of the spheroids for each condition. **F)**  
765 Quantification of the spheroid size, in arbitrary unit. Mean values (+/- SEM) are  
766 represented as histograms.

767

768 **Figure 5: Graphical summary of the potential relationship between EMT activation**  
769 **and the cholesterol pathway.**

770 The mevalonate pathway leads to cholesterol synthesis. Cholesterol is involved in multiple  
771 biological homeostatic mechanisms (Bile acid, steroid hormones and vitamin D precursor,  
772 Membrane stability and rigidity, Lipid raft organization ...). Cholesterol inhibits the

773 synthesis of SREBP1, a transcription factor for the TGF $\beta$ 1 signaling. TGF $\beta$ 1 signaling is a  
774 key feature of the CMS4 mesenchymal class. Our data suggest that low cholesterol in a  
775 pro-EMT environment might favor the differentiation of CMS4 mesenchymal tumors, while  
776 high cholesterol favored more epithelial tumors. Genes down regulated in our Cholesterol  
777 Homeostasis metagene are written in red. Statins are inhibitors of the HMGCR enzyme.  
778  
779

780

781 **Supplementary Figure 1: Cholesterol homeostasis regulator HMGCR and DHCR7 are**  
782 **down regulated by the EMT-inducing cocktail treatment.**

783 Cells were grown in 3D in ULA plate for 2 days (Day-2). At day 0, the EMT and EMT-MET  
784 samples were treated with the EMT-inducing cocktail for 5 days. For EMT-MET samples,  
785 the spheroids were washed off the EMT-inducing cocktail and grown for 4 more days in  
786 normal medium. Cells are collected and lysed with RIPA buffer before to be subjected to a  
787 Western Blot analysis. FIBRONECTINE (FIBRO.) is a mesenchymal marker,  
788 CYTOKERATINES (pan CTK) are mostly epithelial markers, both to verify EMT induction  
789 by the EMT-inducing cocktail. DHCR7 and HMGCR are regulators of the cholesterol  
790 homeostasis pathway. Actin is the loading control.

791

792

793

794

795

796

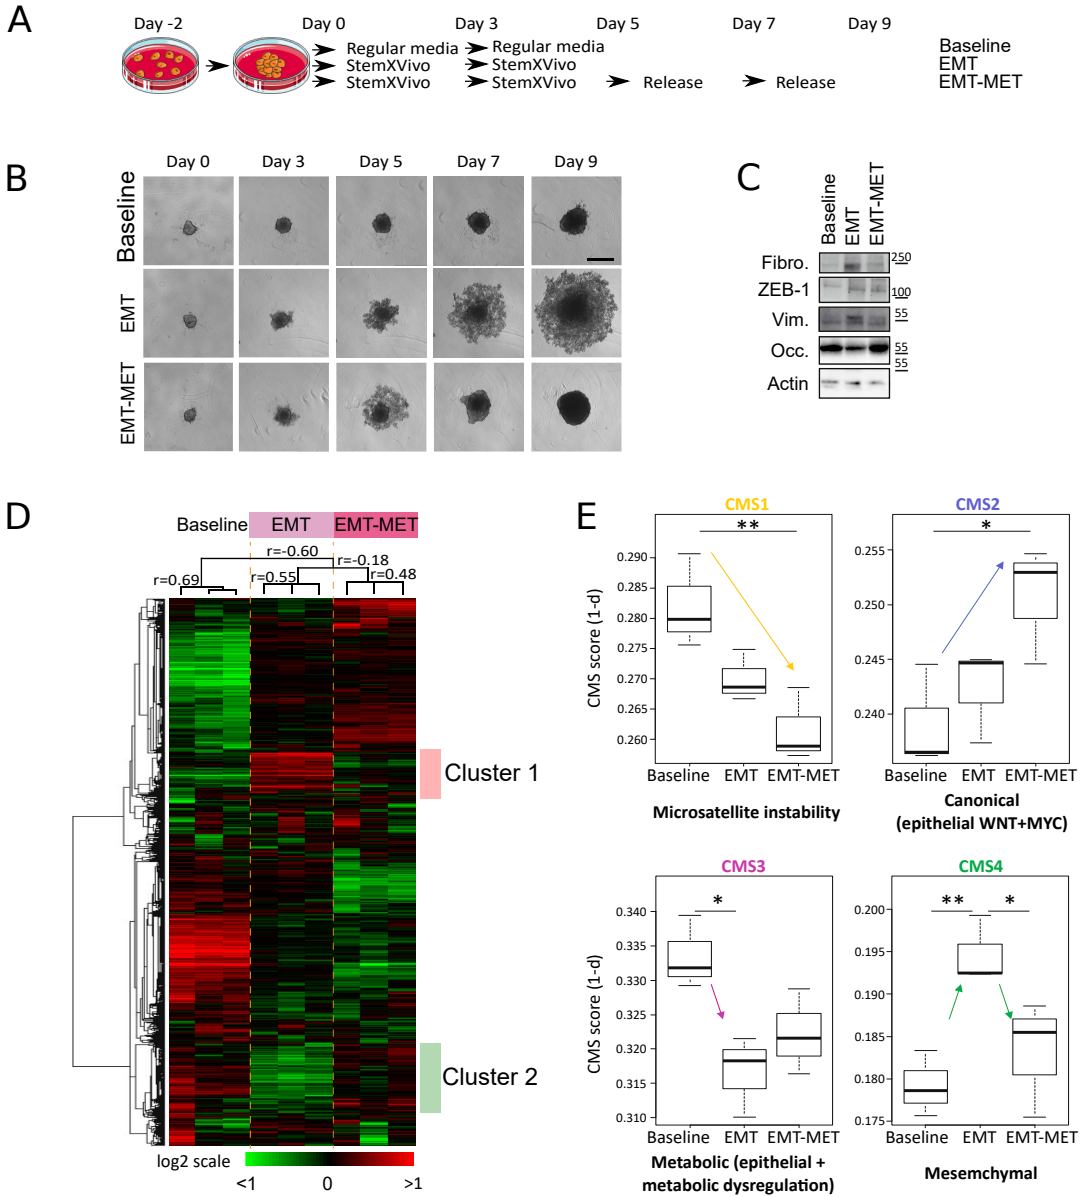

Figure 1



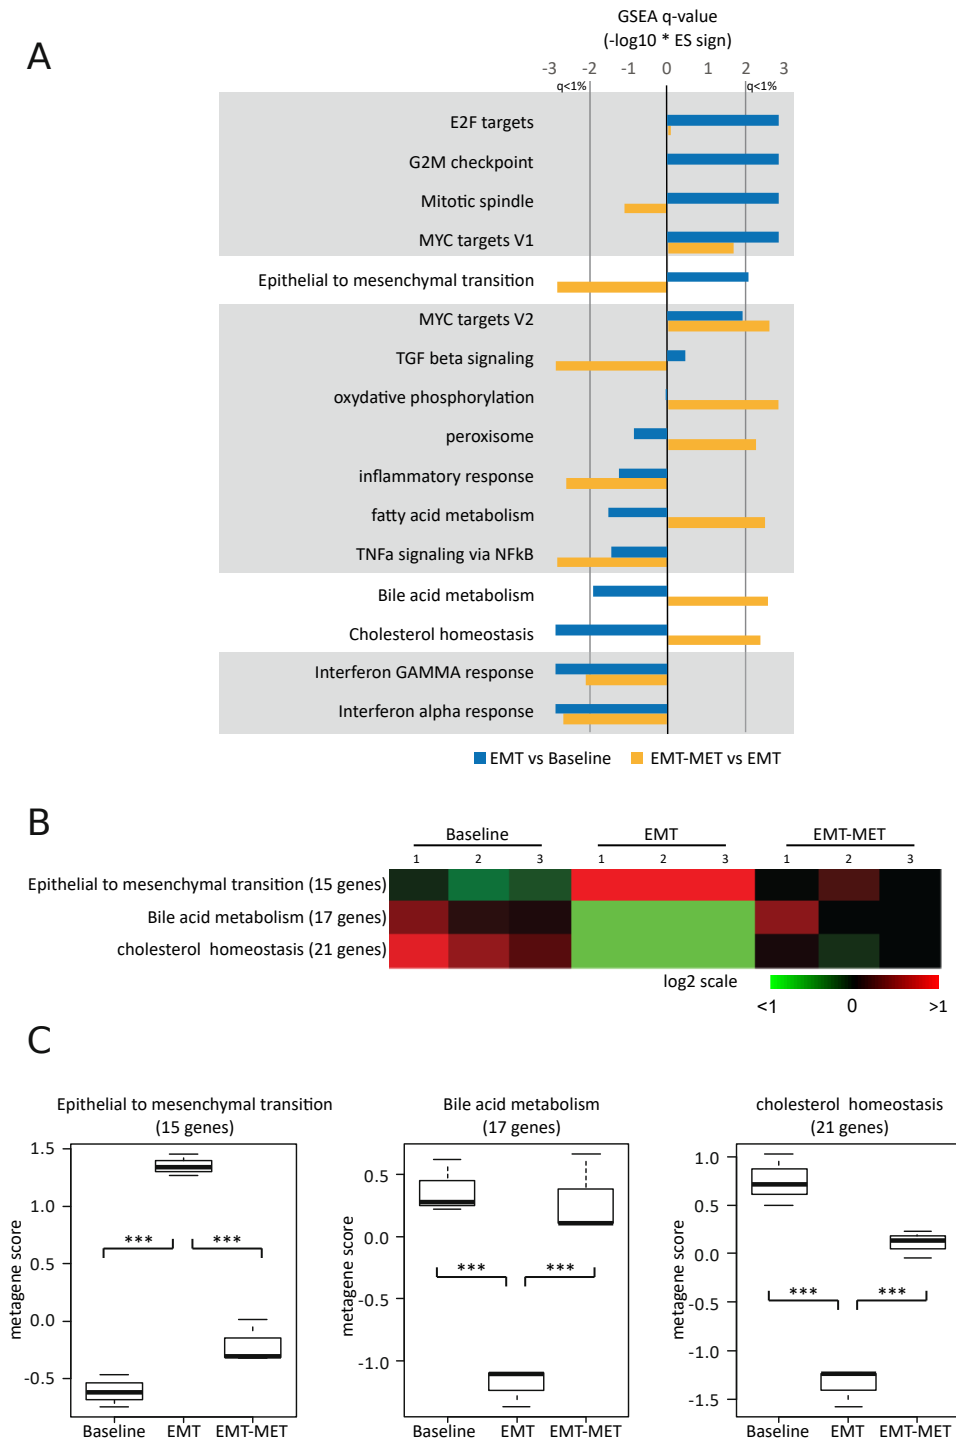

Figure 2

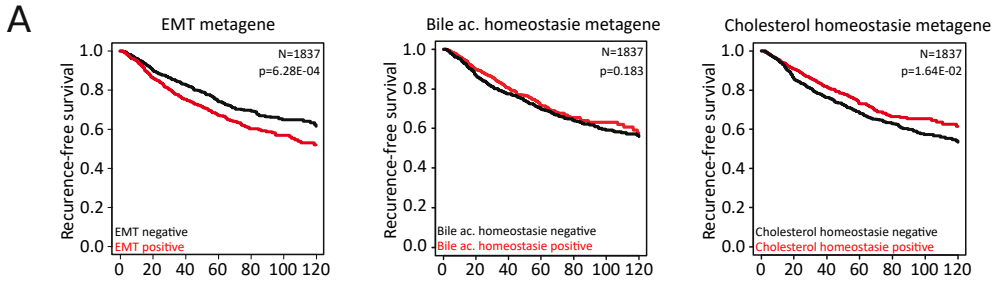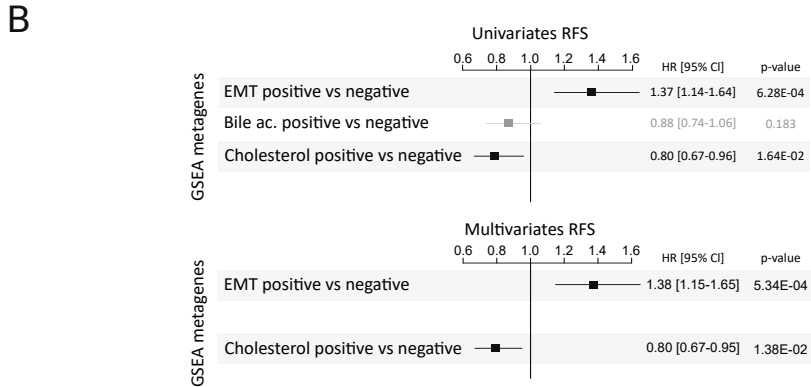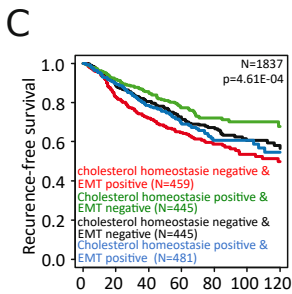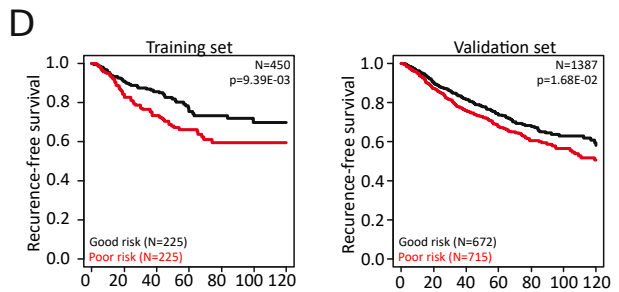

Figure 3

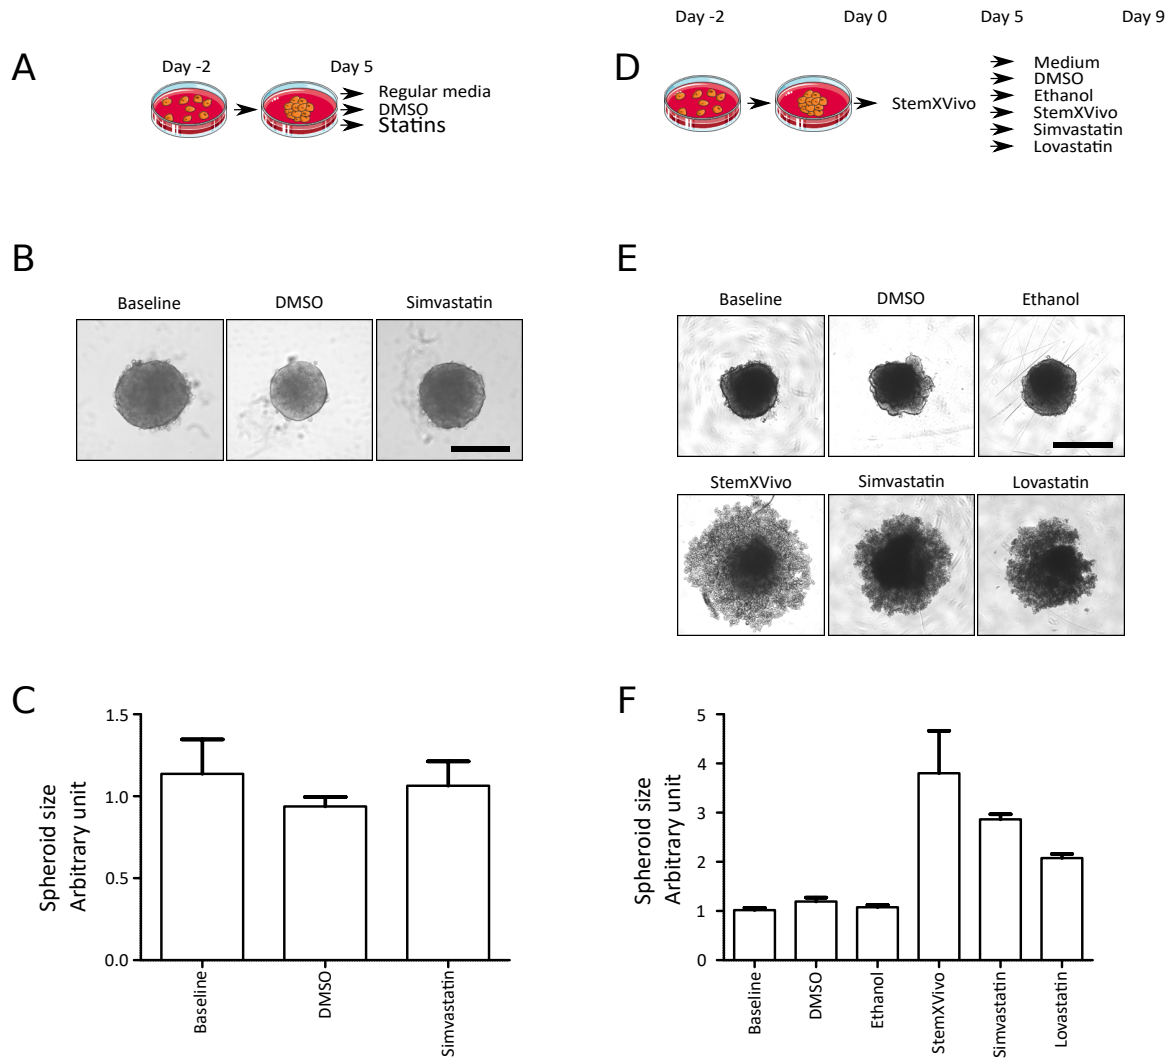

Figure 4

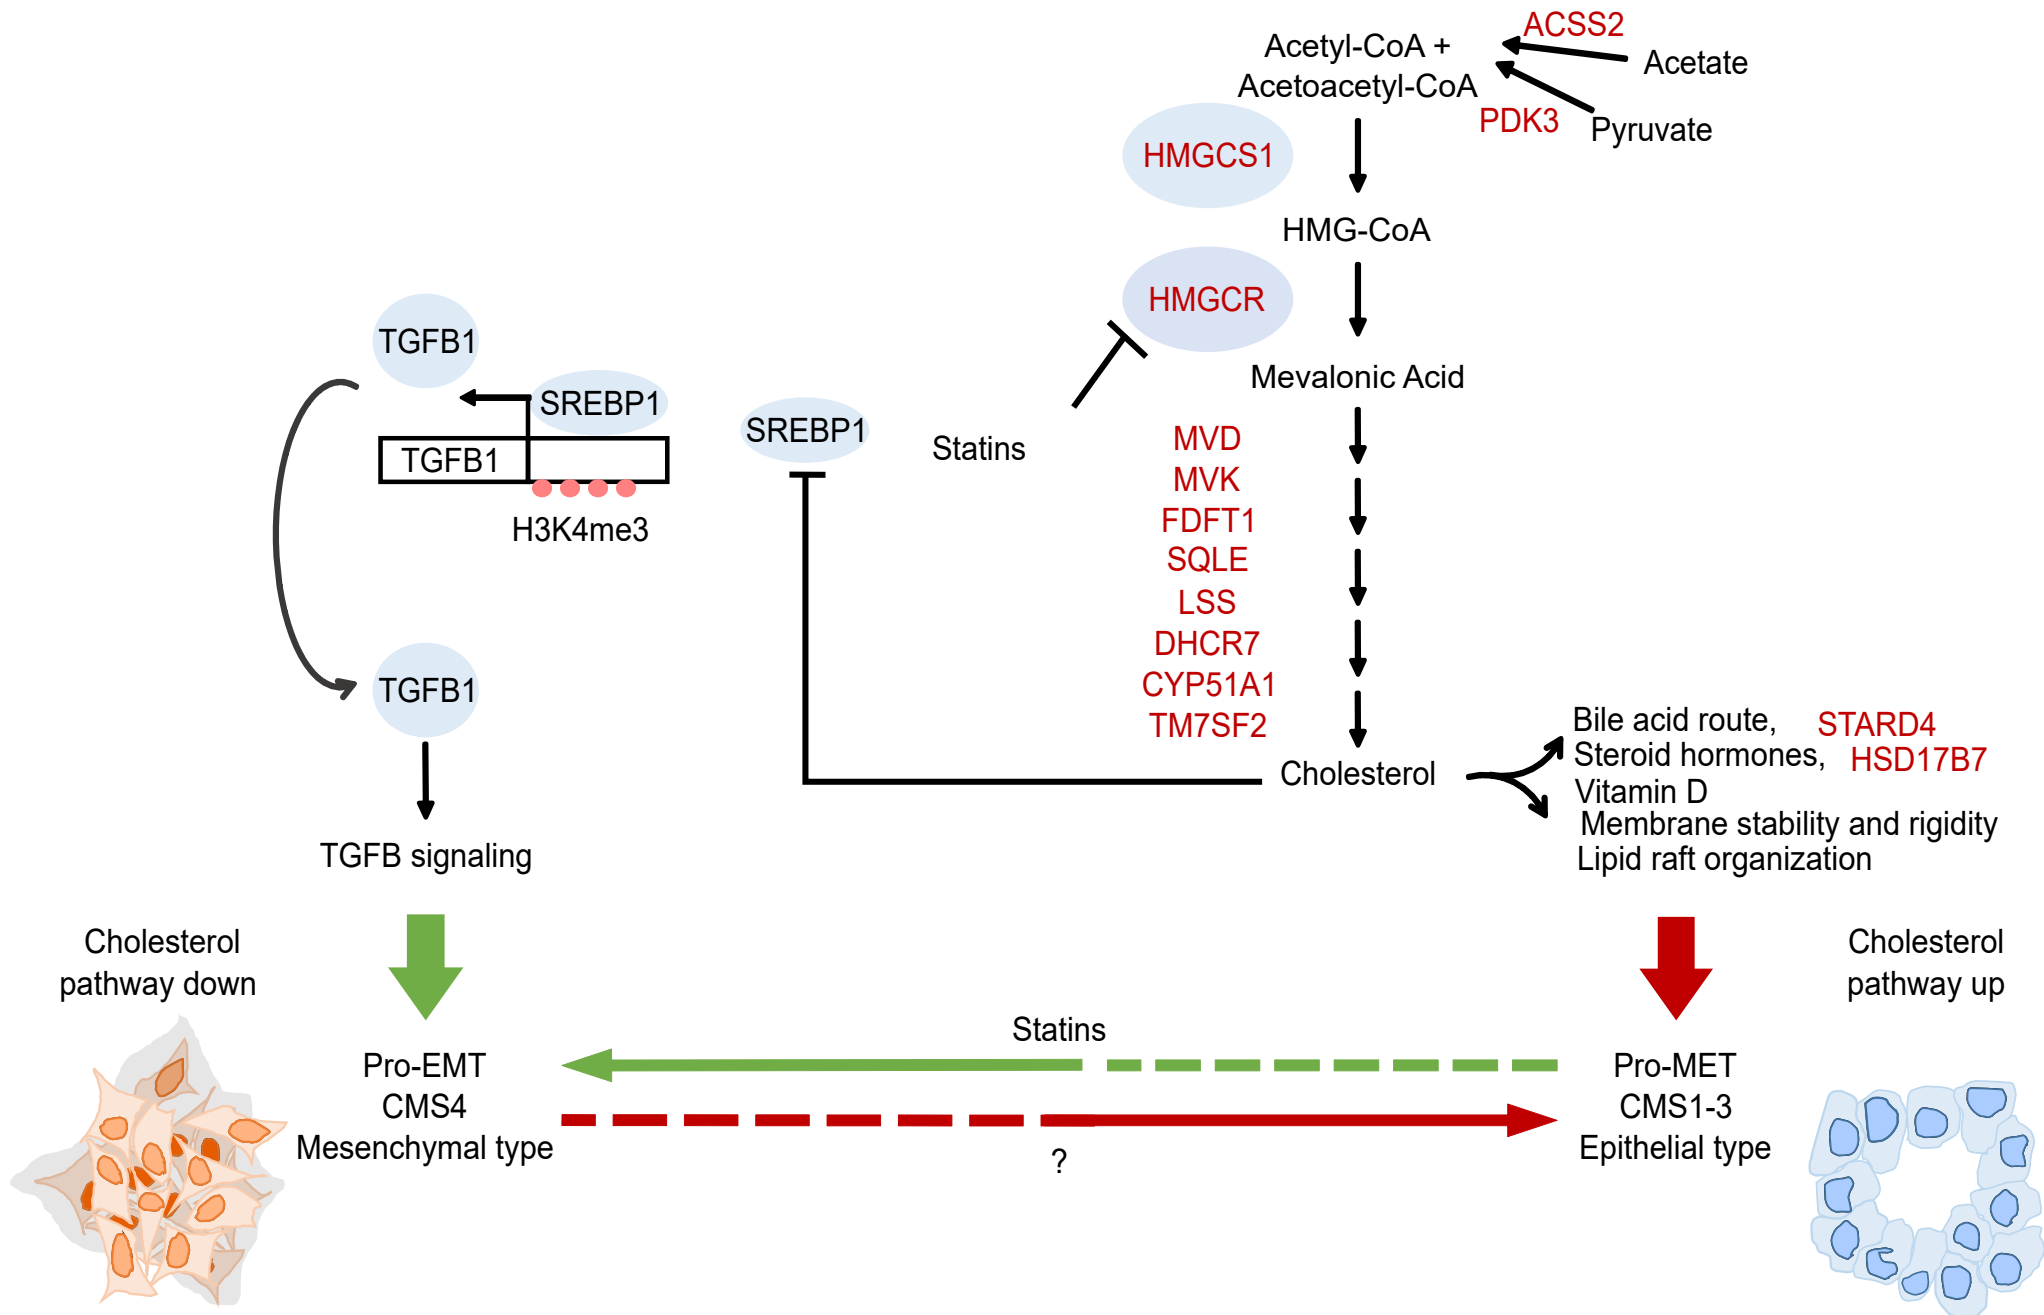

Figure 5

**Table 1:** (which was not certified by peer review) is the author/funder, who has granted medRxiv a license to display the preprint in perpetuity. All rights reserved. No reuse allowed without permission.  
 Clinicopathological characteristics of the 2,239 primary colon cancer samples

| Characteristics                  | N (%)       |
|----------------------------------|-------------|
| Age_Diag50                       |             |
| ≤50                              | 228 (12%)   |
| >50                              | 1702 (88%)  |
| Sex                              |             |
| female                           | 954 (47%)   |
| male                             | 1069 (53%)  |
| Location                         |             |
| distal                           | 840 (50%)   |
| proximal                         | 854 (50%)   |
| pStage                           |             |
| 1                                | 167 (10%)   |
| 2                                | 667 (41%)   |
| 3                                | 548 (34%)   |
| 4                                | 237 (15%)   |
| Grade                            |             |
| 1                                | 26 (6%)     |
| 2                                | 353 (77%)   |
| 3                                | 77 (17%)    |
| CMS                              |             |
| CMS1                             | 389 (20%)   |
| CMS2                             | 640 (32%)   |
| CMS3                             | 343 (17%)   |
| CMS4                             | 604 (31%)   |
| Follow-up median, months (range) | 43 (1-212)  |
| 5y-RFS                           | 71% [68-73] |

**Table 2:**

Correlations of the "EMT-CHL model"-based classes with clinicopathological variables

| <b>EMT' + 'CHL hom.' Cox model<br/>(Validation set)</b> |          |                 |                  |                 |
|---------------------------------------------------------|----------|-----------------|------------------|-----------------|
| <b>Characteristic</b>                                   | <b>N</b> | <b>low-risk</b> | <b>high-risk</b> | <b>p-value</b>  |
| Age_Diag50                                              |          |                 |                  | 0.0507          |
| <=50                                                    | 139      | 25 (8%)         | 114 (13%)        |                 |
| >50                                                     | 1064     | 277 (92%)       | 787 (87%)        |                 |
| Sex                                                     |          |                 |                  | <b>0.00201</b>  |
| female                                                  | 603      | 127 (40%)       | 476 (50%)        |                 |
| male                                                    | 668      | 192 (60%)       | 476 (50%)        |                 |
| Location_2K                                             |          |                 |                  | 0.921           |
| distal                                                  | 517      | 130 (48%)       | 387 (49%)        |                 |
| proximal                                                | 543      | 139 (52%)       | 404 (51%)        |                 |
| pStage                                                  |          |                 |                  | <b>3.00E-04</b> |
| 1                                                       | 123      | 34 (15%)        | 89 (12%)         |                 |
| 2                                                       | 466      | 130 (56%)       | 336 (44%)        |                 |
| 3                                                       | 399      | 67 (29%)        | 332 (44%)        |                 |
| 4                                                       | 0        | 0 (0%)          | 0 (0%)           |                 |
| Grade                                                   |          |                 |                  | 0.876           |
| 1                                                       | 19       | 5 (7%)          | 14 (6%)          |                 |
| 2                                                       | 259      | 59 (78%)        | 200 (80%)        |                 |
| 3                                                       | 47       | 12 (16%)        | 35 (14%)         |                 |
| CMS                                                     |          |                 |                  | <b>3.50E-33</b> |
| CMS1                                                    | 269      | 52 (19%)        | 217 (23%)        |                 |
| CMS2                                                    | 401      | 138 (51%)       | 263 (28%)        |                 |
| CMS3                                                    | 212      | 79 (29%)        | 133 (14%)        |                 |
| CMS4                                                    | 343      | 3 (1%)          | 340 (36%)        |                 |
| Follow-up median, months (range)                        | 1387     | 42 (1-192)      | 42 (1-203)       | 0.387           |
| 5y-RFS                                                  | 1387     | 74% [70-78]     | 68% [64-72]      | 1.68E-02        |

**Table 3:** Uni- and multivariate analyses for RFS in the validation set  
All rights reserved. No reuse allowed without permission.

| RFS           |                     | Univariate |                   |                 | Multivariate |                   |                 |
|---------------|---------------------|------------|-------------------|-----------------|--------------|-------------------|-----------------|
|               |                     | N          | HR [95%CI]        | p-value         | N            | HR [95%CI]        | p-value         |
| Age_Diag50    | >50 vs. <=50        | 1203       | 0.98 [0.70-1.37]  | 0.894           |              |                   |                 |
| Sex           | male vs. female     | 1271       | 1.09 [0.87-1.35]  | 0.458           |              |                   |                 |
| Location      | proximal vs. distal | 1060       | 1.00 [0.79-1.26]  | 0.998           |              |                   |                 |
| pStage        | 2 vs. 1             | 988        | 3.48 [1.41- 8.62] | <b>3.09E-10</b> | 861          | 2.53 [1.01-6.33]  | <b>4.78E-02</b> |
|               | 3 vs. 1             |            | 7.74 [3.16-18.93] |                 | 861          | 5.77 [2.35-14.20] | <b>1.36E-04</b> |
|               | 4 vs. 1             |            | NA [ NA- NA]      |                 | 861          | <NA> [ NA-NA]     | <NA>            |
| Grade         | 2 vs. 1             | 325        | 1.24 [0.39-3.97]  | 0.569           |              |                   |                 |
|               | 3 vs. 1             |            | 1.70 [0.47-6.12]  |                 |              |                   |                 |
| CMS           | CMS2 vs. CMS1       | 1225       | 0.75 [0.54-1.03]  | <b>2.29E-03</b> | 861          | 0.69 [0.43-1.10]  | 0.121           |
|               | CMS3 vs. CMS1       |            | 0.91 [0.64-1.30]  |                 | 861          | 1.13 [0.68-1.90]  | 0.636           |
|               | CMS4 vs. CMS1       |            | 1.28 [0.94-1.73]  |                 | 861          | 1.31 [0.87-1.97]  | 0.196           |
| EMT-CHL model | high- vs. low-risk  | 1387       | 1.35 [1.04-1.75]  | <b>2.51E-02</b> | 861          | 1.7 [1.02-2.83]   | <b>4.02E-02</b> |

**Table 4:**

Top 15 drug classes identified with connectivity map (L1000), 14 EMT vs. 21g CHL GSEA core genes

| Drug class (moa)                | Number of significant pertubagen signatures | Normalised connectivity score (ncs): average ncs | ncs average 95% CI   | reproducibility of ncs per drug class (t-test) |                 |                |
|---------------------------------|---------------------------------------------|--------------------------------------------------|----------------------|------------------------------------------------|-----------------|----------------|
|                                 |                                             |                                                  |                      | t                                              | p.value         | score          |
| Dopamine receptor antagonist    | 93                                          | -1.64                                            | [-1.67,-1.61]        | -98.47                                         | 4.83E-95        | -94.316        |
| EGFR inhibitor                  | 80                                          | -1.65                                            | [-1.74,-1.55]        | -33.31                                         | 2.86E-48        | -47.544        |
| Serotonin receptor antagonist   | 44                                          | -1.63                                            | [-1.68,-1.58]        | -62.43                                         | 7.92E-44        | -43.101        |
| PDGFR inhibitor                 | 37                                          | -1.65                                            | [-1.71,-1.59]        | -57.98                                         | 3.75E-37        | -36.426        |
| Bcr-Abl inhibitor               | 33                                          | -1.67                                            | [-1.72,-1.62]        | -63.64                                         | 2.85E-35        | -34.545        |
| Abl inhibitor                   | 33                                          | -1.67                                            | [-1.72,-1.62]        | -63.64                                         | 2.85E-35        | -34.545        |
| Histamine receptor antagonist   | 33                                          | -1.61                                            | [-1.66,-1.56]        | -62.66                                         | 4.67E-35        | -34.331        |
| KIT inhibitor                   | 34                                          | -1.66                                            | [-1.72,-1.6]         | -56.25                                         | 2.34E-34        | -33.631        |
| Adrenergic receptor antagonist  | 30                                          | -1.61                                            | [-1.66,-1.55]        | -58.08                                         | 1.46E-31        | -30.836        |
| <b>HMGCR inhibitor / statin</b> | <b>31</b>                                   | <b>-1.67</b>                                     | <b>[-1.74,-1.61]</b> | <b>-53.31</b>                                  | <b>2.79E-31</b> | <b>-30.554</b> |
| Src inhibitor                   | 30                                          | -1.71                                            | [-1.77,-1.64]        | -55.4                                          | 5.65E-31        | -30.248        |
| Calcium channel blocker         | 24                                          | -1.66                                            | [-1.72,-1.61]        | -61.46                                         | 5.13E-27        | -26.29         |
| Tricyclic antidepressant        | 26                                          | -1.7                                             | [-1.77,-1.63]        | -48.88                                         | 2.45E-26        | -25.611        |
| Estrogen receptor antagonist    | 25                                          | -1.68                                            | [-1.75,-1.62]        | -52.34                                         | 2.99E-26        | -25.524        |
| VEGFR inhibitor                 | 50                                          | -1.63                                            | [-1.78,-1.47]        | -21.1                                          | 3.04E-26        | -25.517        |
